# Supplementary material for: The evolution of the vestibular apparatus in apes and humans
Source: eLife. 2020 Mar 3;9:e51261. doi: 10.7554/eLife.51261 (PMC7054002; doi:10.7554/eLife.51261)
Supplement: Figure 2—source data 1. — The variance explained by each bgPC is reported within parentheses. Table provided as a separate Excel file. [file elife-51261-fig2-data1.xlsx]

## Sheet: Def_bgpcscores_all_ind
ID	Species	bgPC1 (68.79%)	bgPC2 (19.60%)	bgPC3 (11.61%)
DUEALP02	Alouatta palliata	-0.135436	1.31677	-0.169538
DUEALP04	Alouatta palliata	0.309152	1.22538	-0.33113
DUEALP06	Alouatta palliata	-0.190751	1.33887	-0.165332
DUEALP10	Alouatta palliata	-0.576281	1.29992	-0.231684
DUEALP12	Alouatta palliata	0.198001	1.36332	-0.0254403
MCZ10138	Ateles geoffroyi	-0.0514933	2.12033	0.216285
MCZ29626	Ateles geoffroyi	0.21484	1.79478	0.138467
MCZ29628	Ateles geoffroyi	-0.222034	2.06526	0.10177
MCZ29658	Ateles geoffroyi	-0.484274	1.8321	0.365817
MCZBOM5351	Ateles geoffroyi	0.480973	1.99792	0.0661091
MCZ27891	Cebus apella	-1.17299	1.16489	0.347961
MCZ31063	Cebus apella	-0.705969	0.49852	-0.0448238
MCZ37833	Cebus apella	-0.654082	1.02349	0.203342
MCZ41090	Cebus apella	-0.661405	1.00433	0.519599
MCZ49635	Cebus apella	-0.687405	0.836143	0.443709
AMNHM52634	Cercocebus galeritus	0.609942	-0.352498	0.218429
AMNHM52635	Cercocebus galeritus	0.980674	-0.136611	0.205171
AMNHM52640	Cercocebus galeritus	1.35912	-0.130507	0.260058
AMNHM52641	Cercocebus galeritus	0.968652	-0.200438	0.477078
AMNHM52645	Cercocebus galeritus	0.3486	-0.430642	0.445394
MCZ22734	Cercopithecus mitis	0.42291	-0.407801	0.283296
MCZ25022	Cercopithecus mitis	-0.128399	0.00507628	0.397126
MCZ26832	Cercopithecus mitis	0.628496	-0.0468206	0.502206
MCZ39389	Cercopithecus mitis	0.544237	-0.0831386	0.335429
MCZ44264	Cercopithecus mitis	1.06312	-0.18914	0.156526
SIU4792	Chlorocebus pygerythrus	-1.15436	0.0699522	0.326902
SIU4793	Chlorocebus pygerythrus	-0.595422	-0.0997175	0.445886
SIU4794	Chlorocebus pygerythrus	0.0402313	-0.231388	0.469493
SIU4795	Chlorocebus pygerythrus	-0.54742	0.168731	0.42295
SIU4796	Chlorocebus pygerythrus	0.00134615	0.242742	0.195732
AMNHM52211	Colobus guereza	0.968331	0.13954	0.421358
AMNHM52213	Colobus guereza	0.894424	0.313991	0.227111
AMNHM52225	Colobus guereza	0.508258	0.412666	0.347163
AMNHM52237	Colobus guereza	0.989578	0.590278	0.410934
AMNHM52249	Colobus guereza	1.91111	0.20227	0.239066
MCZ37280	Erythrocebus patas	0.23718	-0.64388	-0.0717417
MCZ47015	Erythrocebus patas	-0.661089	-0.56405	0.365733
MCZ47016	Erythrocebus patas	-0.395383	-0.687779	0.262397
MCZ47017	Erythrocebus patas	-0.318503	-0.273827	0.313425
MCZ47018	Erythrocebus patas	-0.0847493	-0.764479	0.0597876
AMNHA999686	Gorilla gorilla	-1.39736	-0.943671	0.0668351
AMNHA999687	Gorilla gorilla	-2.19512	-0.87261	0.224965
AMNHM167338	Gorilla gorilla	-1.34459	-0.890478	0.164661
AMNHM54356	Gorilla gorilla	-3.04681	-0.517265	0.226828
MCZ17684	Gorilla gorilla	-0.731454	-0.977208	0.419355
MCZ26850	Gorilla gorilla	-2.1289	-0.830257	0.237983
MCZ37264	Gorilla gorilla	-0.697558	-1.0718	-0.162814
AMNHM112673	Hoolock hoolock	0.108749	0.0420318	-1.01496
AMNHM112720	Hoolock hoolock	0.36719	-0.310094	-0.868473
AMNHM112983	Hoolock hoolock	-0.264922	0.328515	-0.698076
AMNHM201742	Hoolock hoolock	0.298535	-0.0328266	-0.905193
AMNHM83421	Hoolock hoolock	0.0484416	0.189867	-0.474761
AMNHM83425	Hoolock hoolock	0.498039	0.517269	-0.702683
EMBR121	Homo sapiens	-1.72658	-0.226272	0.171314
EMBR179	Homo sapiens	-1.37637	0.454727	0.177942
EMBR212	Homo sapiens	-1.78125	0.345347	-0.437396
EMBR215	Homo sapiens	-2.21052	0.608113	0.274451
EMBR281	Homo sapiens	-1.94296	0.202968	0.265285
MCZ41411	Hylobates lar	0.296412	-0.0355546	-1.25235
MCZ41412	Hylobates lar	0.538401	0.151998	-1.14472
MCZ41416	Hylobates lar	1.26293	-0.398473	-1.2053
MCZ41418	Hylobates lar	1.09071	-0.305951	-1.08967
MCZ41421	Hylobates lar	0.680964	-0.211429	-1.4108
MCZ41424	Hylobates lar	0.241244	-0.00612855	-1.31579
MCZ41452	Hylobates lar	0.59058	-0.394382	-1.15044
AMNHM52596	Lophocebus albigena	0.871229	0.0825088	0.343639
AMNHM52603	Lophocebus albigena	0.734813	0.0164181	0.44188
AMNHM52606	Lophocebus albigena	0.976325	-0.00783867	0.219108
AMNHM52607	Lophocebus albigena	1.38137	0.0165677	0.268928
AMNHM52615	Lophocebus albigena	0.969577	0.14128	0.397617
MCZ12758	Macaca fascicularis	-0.0458875	-0.322952	0.609602
MCZ22277	Macaca fascicularis	1.04145	-0.0157767	0.296567
MCZ23812	Macaca fascicularis	-0.255184	-0.291907	0.244233
MCZ23813	Macaca fascicularis	0.784617	-0.421405	0.114006
MCZ35765	Macaca fascicularis	0.714698	-0.147691	0.262946
AMNHA9912049	Mandrillus sphinx	0.635028	0.159806	0.45918
AMNHA9912056	Mandrillus sphinx	0.683185	-0.665878	0.114401
AMNHM89362	Mandrillus sphinx	0.603492	-0.445372	-0.0852791
AMNHM89364	Mandrillus sphinx	1.23946	-0.823177	0.112601
AMNHM89365	Mandrillus sphinx	0.582178	-0.0782447	0.264764
MCZ19976	Miopithecus talapoin	-0.265226	-0.0861782	-0.0545524
MCZ23196	Miopithecus talapoin	0.129585	0.0193473	0.340044
MCZ23197	Miopithecus talapoin	0.178326	-0.118464	0.281563
MCZ34264	Miopithecus talapoin	0.0813575	-0.0453519	0.175834
MCZ37278	Miopithecus talapoin	0.259878	-0.15111	0.387635
MCZ37342	Nasalis larvatus	0.36144	-0.261663	0.131572
MCZ41555	Nasalis larvatus	0.932265	-0.44458	0.145124
MCZ41559	Nasalis larvatus	0.0149707	-0.250418	0.0924755
MCZ41560	Nasalis larvatus	-0.0708025	0.29028	0.310094
MCZ41562	Nasalis larvatus	-0.34981	0.0130743	0.535466
AMNHM52677	Papio anubis	1.12657	-0.368206	0.239674
MCZ17342	Papio anubis	0.889067	-0.301089	0.122286
MCZ26473	Papio anubis	1.0064	-0.419289	0.0698473
MCZ31619	Papio anubis	1.68861	-0.43478	0.139116
MCZBOM8466	Papio anubis	0.473962	-0.580455	0.514309
IPS9033	Pan paniscus	-1.40868	-0.100255	0.259961
MCZ38018	Pan paniscus	-0.766105	-0.552065	-0.208525
MCZ38019	Pan paniscus	-0.932036	0.0178524	-0.0462349
MCZ38020	Pan paniscus	-1.01409	-0.0911227	0.0415951
AMNHM86857	Pan paniscus	-2.24413	-0.161429	-0.0147837
AMNHM167342	Pan troglodytes	-1.55126	-0.195443	0.0716065
AMNHM167344	Pan troglodytes	-1.0503	-0.373725	0.188277
AMNHM51204	Pan troglodytes	-1.27206	-0.451886	-0.0691937
IPS5698	Pan troglodytes	-1.23622	-0.015243	-0.202223
MCZ17702	Pan troglodytes	-0.277334	-0.654284	-0.168375
MCZ23167	Pan troglodytes	-1.0855	-0.851949	-0.0707566
MCZ26847	Pan troglodytes	-1.07409	0.113841	-0.0284117
MCZ24080	Piliocolobus badius	1.18941	-0.180615	-0.153845
MCZ24775	Piliocolobus badius	1.63295	0.0568208	0.0951187
MCZ24793	Piliocolobus badius	1.20024	0.591644	-0.310707
MCZ25627	Piliocolobus badius	1.19407	-0.00595424	0.191167
MCZ25631	Piliocolobus badius	1.38718	-0.366636	-0.205134
IPS10647	Pongo pygmaeus	-3.27242	-0.014915	-0.157775
IPS10651	Pongo pygmaeus	-2.56532	0.345512	-0.257045
IPS9031	Pongo pygmaeus	-2.5689	-0.282706	-0.531204
IPSSN	Pongo pygmaeus	-2.14456	-0.38264	0.129423
MHNTZOO201108	Pongo pygmaeus	-2.85358	0.412576	-0.202765
SENCK1576UU	Pongo pygmaeus	-2.41248	-0.0938704	0.0259098
MCZ35621	Presbytis hosei	1.05471	-0.400155	0.092754
MCZ37370	Presbytis hosei	0.379043	0.271744	-0.0291511
MCZ37371	Presbytis hosei	0.986834	0.105759	-0.135952
MCZ37372	Presbytis hosei	1.32429	-0.471389	-0.490786
MCZ37772	Presbytis hosei	0.607338	0.463357	-0.157332
MCZ22276	Presbytis rubicunda	2.02133	-0.511052	-0.183433
MCZ35704	Presbytis rubicunda	1.19744	-0.409704	-0.161012
MCZ35705	Presbytis rubicunda	1.26563	-0.3636	-0.0246382
MCZ35706	Presbytis rubicunda	0.934431	-0.319851	0.160319
MCZ35712	Presbytis rubicunda	0.929548	-0.319981	-0.0137587
AMNHM102724	Symphalangus syndactylus	-0.0691474	0.651383	-0.88273
AMNHM106583	Symphalangus syndactylus	0.223732	-0.362757	-1.08928
MCZ36031	Symphalangus syndactylus	0.618182	0.162923	-1.01945
MCZ36032	Symphalangus syndactylus	1.26902	-0.423031	-0.611169
AMNHM19549	Theropithecus gelada	-0.0350063	-0.182568	0.109163
AMNHM238034	Theropithecus gelada	0.863336	0.0232224	0.0631856
AMNHM60568	Theropithecus gelada	0.19898	0.436679	0.167824
AMNHM80126	Theropithecus gelada	0.418046	0.459119	0.388216
AMNHM90309	Theropithecus gelada	0.339981	0.28013	0.307787
MCZ35567	Trachypithecus cristatus	0.330884	-0.503599	-0.0105021
MCZ35584	Trachypithecus cristatus	0.170016	-0.0886986	0.0958388
MCZ35586	Trachypithecus cristatus	0.254448	-0.355741	-0.0474601
MCZ35597	Trachypithecus cristatus	0.702999	-0.88099	-0.00161287
MCZ35603	Trachypithecus cristatus	0.336668	-0.683137	0.0541997
BAC208	Oreopithecus bambolii	0.936319	-0.428498	-0.475865
StW573	Australopithecus sp.	2.3576	-0.4872	-0.147937
StW578	Australopithecus sp.	1.59749	0.206597	-0.270474
