# Supplementary material for: The evolution of the vestibular apparatus in apes and humans
Source: eLife. 2020 Mar 3;9:e51261. doi: 10.7554/eLife.51261 (PMC7054002; doi:10.7554/eLife.51261)
Supplement: Figure 7—source data 1. — Table provided as a separate Excel file. [file elife-51261-fig7-data1.xlsx]

## Sheet: Volumetric_proportions_all_ind
ID	Species	ln Len	ln Vol	ln VolSC
DUEALP02	Alouatta palliata	3.6538	3.26329	2.53098
DUEALP04	Alouatta palliata	3.52868	2.70192	2.01094
DUEALP06	Alouatta palliata	3.65827	3.27141	2.50888
DUEALP10	Alouatta palliata	3.55105	3.15004	2.48233
DUEALP12	Alouatta palliata	3.66022	3.13169	2.37975
MCZ10138	Ateles geoffroyi	3.68502	3.42257	2.80996
MCZ29626	Ateles geoffroyi	3.59635	2.99462	2.42582
MCZ29628	Ateles geoffroyi	3.61969	3.20682	2.67894
MCZ29658	Ateles geoffroyi	3.55948	3.14067	2.59308
MCZBOM5351	Ateles geoffroyi	3.77416	3.27421	2.72738
MCZ27891	Cebus apella	3.40731	2.93675	2.39513
MCZ31063	Cebus apella	3.45543	2.87984	2.39193
MCZ37833	Cebus apella	3.52164	3.0763	2.47946
MCZ41090	Cebus apella	3.50736	2.96424	2.47713
MCZ49635	Cebus apella	3.52604	3.01613	2.46248
AMNHM52634	Cercocebus galeritus	3.66112	3.10885	2.43659
AMNHM52635	Cercocebus galeritus	3.73672	3.05677	2.3285
AMNHM52640	Cercocebus galeritus	3.70773	3.00883	2.20666
AMNHM52641	Cercocebus galeritus	3.69148	3.01994	2.36417
AMNHM52645	Cercocebus galeritus	3.55349	2.94584	2.35085
MCZ22734	Cercopithecus mitis	3.44725	2.64293	2.1345
MCZ25022	Cercopithecus mitis	3.34938	2.75221	2.16714
MCZ26832	Cercopithecus mitis	3.5209	2.88221	2.22094
MCZ39389	Cercopithecus mitis	3.48483	2.65702	2.12155
MCZ44264	Cercopithecus mitis	3.55489	2.6967	2.03883
SIU4792	Chlorocebus pygerythrus	3.39253	2.9036	2.43339
SIU4793	Chlorocebus pygerythrus	3.52874	3.03453	2.56324
SIU4794	Chlorocebus pygerythrus	3.64153	3.06683	2.57987
SIU4795	Chlorocebus pygerythrus	3.4845	2.96094	2.47113
SIU4796	Chlorocebus pygerythrus	3.61081	3.07073	2.54705
AMNHM52211	Colobus guereza	3.73707	3.16099	2.44526
AMNHM52213	Colobus guereza	3.71958	3.17649	2.49149
AMNHM52225	Colobus guereza	3.64858	3.06098	2.44359
AMNHM52237	Colobus guereza	3.74349	3.14701	2.43564
AMNHM52249	Colobus guereza	3.81947	2.94304	2.23971
MCZ37280	Erythrocebus patas	3.61461	3.14839	2.56131
MCZ47015	Erythrocebus patas	3.62575	3.4483	2.8755
MCZ47016	Erythrocebus patas	3.65857	3.45764	2.90139
MCZ47017	Erythrocebus patas	3.56581	3.03735	2.52889
MCZ47018	Erythrocebus patas	3.56725	3.0498	2.46528
AMNHA999686	Gorilla gorilla	3.80684	4.32967	3.53005
AMNHA999687	Gorilla gorilla	3.75481	4.49837	3.65848
AMNHM167338	Gorilla gorilla	3.90464	4.76228	3.86303
AMNHM54356	Gorilla gorilla	3.70019	4.87812	4.00319
MCZ17684	Gorilla gorilla	3.8656	4.19451	3.39584
MCZ26850	Gorilla gorilla	3.74908	4.61116	3.71298
MCZ37264	Gorilla gorilla	3.72596	3.91182	3.02705
AMNHM112673	Hoolock hoolock	3.73321	3.33348	2.66761
AMNHM112720	Hoolock hoolock	3.72812	3.30983	2.58722
AMNHM112983	Hoolock hoolock	3.68895	3.38703	2.81951
AMNHM201742	Hoolock hoolock	3.76457	3.61865	2.91921
AMNHM83421	Hoolock hoolock	3.75176	3.40443	2.78804
AMNHM83425	Hoolock hoolock	3.74701	3.21016	2.56212
EMBR121	Homo sapiens	3.83359	4.50016	3.60221
EMBR179	Homo sapiens	3.85259	4.56044	3.64734
EMBR212	Homo sapiens	3.69035	4.23231	3.33495
EMBR215	Homo sapiens	3.7329	4.72444	3.84593
EMBR281	Homo sapiens	3.85685	4.97179	4.06288
MCZ41411	Hylobates lar	3.58693	2.9625	2.25206
MCZ41412	Hylobates lar	3.67706	3.16798	2.42554
MCZ41416	Hylobates lar	3.7248	3.13841	2.2596
MCZ41418	Hylobates lar	3.73407	3.09708	2.28854
MCZ41421	Hylobates lar	3.64975	3.11841	2.35771
MCZ41424	Hylobates lar	3.65553	3.19772	2.41615
MCZ41452	Hylobates lar	3.61488	2.9941	2.29216
AMNHM52596	Lophocebus albigena	3.68582	3.11151	2.41398
AMNHM52603	Lophocebus albigena	3.75265	3.15215	2.54299
AMNHM52606	Lophocebus albigena	3.58193	2.78504	2.16608
AMNHM52607	Lophocebus albigena	3.72355	3.01599	2.30258
AMNHM52615	Lophocebus albigena	3.71243	3.06062	2.41009
MCZ12758	Macaca fascicularis	3.54108	2.99707	2.35212
MCZ22277	Macaca fascicularis	3.61754	2.73983	2.12207
MCZ23812	Macaca fascicularis	3.47779	2.87807	2.23137
MCZ23813	Macaca fascicularis	3.57425	2.69285	2.06307
MCZ35765	Macaca fascicularis	3.56589	2.73561	2.12591
AMNHA9912049	Mandrillus sphinx	3.67716	3.21745	2.51564
AMNHA9912056	Mandrillus sphinx	3.6926	3.20983	2.51543
AMNHM89362	Mandrillus sphinx	3.66888	3.22785	2.49567
AMNHM89364	Mandrillus sphinx	3.71922	3.12594	2.3865
AMNHM89365	Mandrillus sphinx	3.61426	3.05119	2.35284
MCZ19976	Miopithecus talapoin	3.38537	2.59491	2.10053
MCZ23196	Miopithecus talapoin	3.46577	2.7183	2.20604
MCZ23197	Miopithecus talapoin	3.34642	2.4094	1.95683
MCZ34264	Miopithecus talapoin	3.36898	2.44393	1.9918
MCZ37278	Miopithecus talapoin	3.46226	2.57747	2.11307
MCZ37342	Nasalis larvatus	3.6915	3.20059	2.58248
MCZ41555	Nasalis larvatus	3.67008	2.92639	2.30151
MCZ41559	Nasalis larvatus	3.67018	3.24199	2.64945
MCZ41560	Nasalis larvatus	3.68893	3.34773	2.70233
MCZ41562	Nasalis larvatus	3.71169	3.48354	2.90767
AMNHM52677	Papio anubis	3.81465	3.38136	2.58148
MCZ17342	Papio anubis	3.64286	3.13665	2.35043
MCZ26473	Papio anubis	3.67708	3.19374	2.37047
MCZ31619	Papio anubis	3.8552	3.12057	2.4501
MCZBOM8466	Papio anubis	3.5944	3.07789	2.39053
IPS9033	Pan paniscus	3.69143	3.87576	3.06357
MCZ38018	Pan paniscus	3.68012	3.83259	2.94296
MCZ38019	Pan paniscus	3.69088	3.81604	2.96128
MCZ38020	Pan paniscus	3.57881	3.8882	2.97975
AMNHM86857	Pan paniscus	3.64993	4.1331	3.22279
AMNHM167342	Pan troglodytes	3.67181	4.171	3.29562
AMNHM167344	Pan troglodytes	3.70234	4.09382	3.17374
AMNHM51204	Pan troglodytes	3.73738	4.23725	3.36162
IPS5698	Pan troglodytes	3.7657	4.37515	3.41253
MCZ17702	Pan troglodytes	3.66669	3.83726	2.8614
MCZ23167	Pan troglodytes	3.58801	3.71005	2.78719
MCZ26847	Pan troglodytes	3.63582	3.95615	2.95136
MCZ24080	Piliocolobus badius	3.49636	2.545	1.91402
MCZ24775	Piliocolobus badius	3.59756	2.44454	1.83936
MCZ24793	Piliocolobus badius	3.58779	2.66507	1.98438
MCZ25627	Piliocolobus badius	3.51229	2.52545	1.86645
MCZ25631	Piliocolobus badius	3.60425	2.59422	2.00183
IPS10647	Pongo pygmaeus	3.65973	4.83229	3.90947
IPS10651	Pongo pygmaeus	3.75037	4.68555	3.82832
IPS9031	Pongo pygmaeus	3.5005	4.29677	3.33681
IPSSN	Pongo pygmaeus	3.66166	4.30067	3.42488
MHNTZOO201108	Pongo pygmaeus	3.62647	4.33659	3.56123
SENCK1576UU	Pongo pygmaeus	3.71157	4.51606	3.66229
MCZ35621	Presbytis hosei	3.56196	2.78654	1.97656
MCZ37370	Presbytis hosei	3.57929	3.00503	2.30891
MCZ37371	Presbytis hosei	3.61883	2.90115	2.17026
MCZ37372	Presbytis hosei	3.51572	2.63118	1.91775
MCZ37772	Presbytis hosei	3.61564	2.90869	2.31813
MCZ22276	Presbytis rubicunda	3.73206	2.81921	2.11105
MCZ35704	Presbytis rubicunda	3.66264	2.90657	2.25002
MCZ35705	Presbytis rubicunda	3.69295	2.94937	2.30603
MCZ35706	Presbytis rubicunda	3.641	2.96345	2.38292
MCZ35712	Presbytis rubicunda	3.67817	3.03217	2.403
AMNHM102724	Symphalangus syndactylus	3.67135	3.30858	2.62166
AMNHM106583	Symphalangus syndactylus	3.7386	3.53572	2.59174
MCZ36031	Symphalangus syndactylus	3.7323	3.24456	2.41444
MCZ36032	Symphalangus syndactylus	3.7934	3.14775	2.33659
AMNHM19549	Theropithecus gelada	3.66653	3.21252	2.57526
AMNHM238034	Theropithecus gelada	3.60553	2.6905	2.09606
AMNHM60568	Theropithecus gelada	3.627	3.04463	2.43485
AMNHM80126	Theropithecus gelada	3.66063	2.91577	2.24117
AMNHM90309	Theropithecus gelada	3.63011	3.02162	2.3896
MCZ35567	Trachypithecus cristatus	3.59942	2.91824	2.42916
MCZ35584	Trachypithecus cristatus	3.63924	3.16392	2.55989
MCZ35586	Trachypithecus cristatus	3.65273	3.11374	2.55254
MCZ35597	Trachypithecus cristatus	3.65061	2.95763	2.43316
MCZ35603	Trachypithecus cristatus	3.66441	3.12542	2.57697
BAC208	Oreopithecus bambolii	3.80227	1.38898	1.17453
StW573	Australopithecus sp.	3.69678	1.42526	1.23012
StW570	Australopithecus sp.	3.64281	1.47386	1.23886
