# Supplementary material for: The evolution of the vestibular apparatus in apes and humans
Source: eLife. 2020 Mar 3;9:e51261. doi: 10.7554/eLife.51261 (PMC7054002; doi:10.7554/eLife.51261)
Supplement: Figure 8—source data 1. — The variance explained by each PC is reported. Table provided as a separate Excel file. [file elife-51261-fig8-data1.xlsx]

## Sheet: PCAscore_extant_all_a
ID	Species	PC1	PC2	PC3	PC4	PC5	PC6	PC7	PC8	PC9	PC10	PC11	PC12	PC13	PC14	PC15	PC16	PC17	PC18	PC19	PC20	PC21	PC22	PC23	PC24	PC25	PC26	PC27	PC28	PC29	PC30	PC31	PC32	PC33	PC34	PC35	PC36	PC37	PC38	PC39	PC40	PC41	PC42	PC43	PC44	PC45	PC46	PC47	PC48
	% of variance	0.30734	0.102671	0.0665458	0.0498824	0.0393653	0.0387356	0.0317754	0.0202251	0.0183975	0.0166668	0.0154007	0.0143594	0.014075	0.0123708	0.0107817	0.00993174	0.00931766	0.00893157	0.00860479	0.00768287	0.00739179	0.00719792	0.006652	0.00655915	0.00642107	0.00569317	0.00555914	0.00541161	0.00523682	0.00474428	0.00444875	0.00430628	0.00413842	0.00394217	0.00380026	0.00372382	0.00358522	0.00343292	0.00318791	0.00312256	0.00302766	0.0030051	0.00277058	0.00266338	0.00257091	0.00249812	0.00247786	0.00237401
DUEALP02	Alouatta palliata	-0.0606446	-1.04543	0.526045	0.376599	-0.191582	-0.344898	-0.595783	-0.229826	-0.058155	-0.298097	-0.418147	-0.434056	0.28807	0.282871	0.301151	0.0991146	0.0198514	0.0906942	0.21463	-0.145899	-0.0504786	-0.10906	0.0137018	0.0700666	-0.00667183	0.0863299	0.0355576	0.147399	-0.20752	0.0262684	0.0104997	-0.0144079	-0.00262446	-0.0860861	0.000561655	-0.103745	0.088012	-0.0347973	-0.049551	-0.0318156	0.130717	0.0232437	0.0355335	-0.0140407	-0.0541145	0.0242481	0.0496931	-0.108033
DUEALP04	Alouatta palliata	0.434617	-0.984739	0.596502	0.381534	-0.220147	-0.293382	-0.778233	0.104049	-0.100321	-0.0416267	-0.497296	-0.338494	0.12542	0.401954	0.274801	0.153603	0.0833266	-0.111384	0.0926106	-0.118205	-0.0776818	-0.141288	-0.0339482	0.0234384	0.0735287	-0.0527502	-0.0323331	0.0929296	0.0309107	-0.000370973	-0.0412651	-0.0137372	0.198809	0.060404	-0.0300188	-0.00427455	-0.0104508	0.0208256	0.121544	0.110215	0.1093	-0.0711682	-0.0331702	-0.132191	0.0668346	-0.129608	-0.113659	-0.0151983
DUEALP06	Alouatta palliata	-0.0958878	-1.19528	0.416053	0.233682	-0.230162	-0.406541	-0.744538	0.187681	0.149493	-0.15987	-0.36541	-0.409345	0.219909	0.416185	0.161109	0.108768	0.0797164	-0.116125	0.0104009	-0.151596	-0.100445	0.0353987	0.156089	-0.0207735	-0.0838757	-0.00680246	0.0246689	0.0625346	-0.218902	-0.0905673	-0.00701327	0.0213413	0.0400114	0.188044	0.0606955	-0.104488	0.0355944	-0.0425117	0.0150472	0.15769	0.0608853	-0.000842175	-0.0837687	-0.00868559	0.024194	-0.101951	-0.0617188	-0.0103773
DUEALP10	Alouatta palliata	-0.45931	-0.924511	0.767708	0.392264	-0.41197	-0.442416	-0.780496	-0.54874	-0.0762008	-0.261487	-0.25015	-0.24494	0.0659963	0.360077	0.273484	-0.109297	-0.148158	0.0445272	0.293113	-0.00792103	0.0264692	0.0828327	-0.0787719	0.014758	-0.0963644	0.236452	0.155798	0.146627	-0.163949	-0.0682235	0.0247984	0.0213294	0.096325	0.00827119	0.162432	-0.380831	-0.0704285	0.00603765	0.15379	-0.00384073	-0.0792134	0.174815	0.179037	0.0346625	0.0659062	0.109893	0.11637	0.0119378
DUEALP12	Alouatta palliata	0.319378	-1.11555	0.570996	0.38855	-0.464848	-0.520943	-0.647181	-0.272439	-0.119492	-0.170411	-0.327483	-0.421355	0.419284	0.269001	0.263453	0.082867	0.317658	0.0160796	0.158754	0.0134687	0.00835309	-0.0271233	-0.0976168	0.0590421	-0.0102501	-0.0752262	-0.117236	-0.00456155	-0.0207282	-0.0921088	-0.0568596	-0.0358824	-0.028165	-0.0310218	-0.00162143	-0.0592054	0.113586	0.0781996	0.0796608	-0.0656604	0.00370891	0.0497699	0.0293018	0.0182423	-0.147037	0.0344808	-0.0106364	-0.0144002
MCZ10138	Ateles geoffroyi	0.00774868	-2.32419	0.0941879	0.0121665	-0.314977	-0.243276	-0.261601	0.298034	0.384014	-0.0842939	0.154101	-0.0244477	-0.311202	-0.508948	-0.162129	-0.0908822	0.28596	0.205596	0.125316	0.331227	0.143198	-0.0844817	0.113253	-0.0014558	0.104016	-0.000706175	0.151766	-0.0543916	0.132217	0.0859543	0.0401107	0.00636169	-0.253	-0.0629501	-0.0128042	0.058462	-0.0461779	0.147919	0.0420155	0.0198776	-0.158448	0.058656	-0.0379437	-0.050118	-4.27e-05	-0.128469	-0.13383	-0.175041
MCZ29626	Ateles geoffroyi	0.233795	-1.79937	0.202308	0.329376	-0.342344	0.0784979	-0.230462	0.0974723	-0.159786	-0.0706819	0.390843	0.0497749	-0.261218	-0.390433	-0.161086	-0.0972296	-0.0121592	0.313156	-0.0208542	0.108482	0.197127	0.0683974	0.140901	-0.0230866	0.0704004	0.0102481	0.0851648	-0.0162275	0.178332	0.252087	-0.0298349	-0.0386772	-0.0485287	-0.0314357	0.0924929	0.0411311	-0.0419824	-0.136046	0.235965	-0.0585459	-0.0286495	-0.0995632	0.077235	0.0701884	0.0448603	0.0936004	0.0386575	-0.0511412
MCZ29628	Ateles geoffroyi	-0.265645	-1.86585	0.388349	0.847809	-0.280545	-0.190919	-0.105116	-0.11286	-0.377364	-0.180958	0.446926	0.156303	-0.375693	-0.359757	0.0149332	0.0514913	0.264103	0.35758	-0.0363353	-0.0339379	0.301082	-0.306512	0.0147738	0.16135	-0.227213	0.18171	-0.0106949	-0.363535	-0.165336	-0.0632786	-0.137214	0.170747	0.127915	-0.158499	-0.121884	0.256845	-0.26565	-0.03236	-0.124111	-0.100219	0.123454	0.0403345	-0.0827327	0.0231699	-0.0613815	0.0377249	0.0194287	0.067071
MCZ29658	Ateles geoffroyi	-0.537758	-1.86624	0.0968388	0.374111	-0.324756	0.054606	0.157784	0.0885361	-0.173799	0.126464	0.14417	-0.0468954	-0.0666176	-0.373378	-0.0652668	0.0499366	0.0120837	0.331541	-0.130707	0.11298	0.266805	0.0727829	0.0147395	0.114444	-0.0602331	0.15389	-0.0304035	-0.0130307	-0.050786	-0.0787304	-0.165296	0.0711003	0.0682878	0.140954	0.0191785	0.16274	0.0504248	-0.211425	0.106766	0.0732128	0.0330439	0.0165969	0.035665	0.0833519	0.181452	0.076615	0.165636	0.167565
MCZBOM5351	Ateles geoffroyi	0.430587	-2.03253	-0.116618	0.529437	0.062326	0.101888	-0.398851	0.523218	0.36817	-0.0945278	0.141302	-0.222029	0.255133	-0.357071	-0.199554	0.414072	-0.0662838	0.185666	-0.208102	0.0658166	0.240389	-0.0840635	0.115512	-0.191673	0.120997	-0.139124	-0.0781806	-0.178884	0.331305	-0.102921	-0.229869	-0.086712	-0.0739495	-0.161606	-0.0209355	-0.00492313	0.0981818	0.0804567	-0.15377	0.113158	-0.080689	-0.0834153	0.0285026	0.055625	-0.0045679	-0.00385024	-0.199213	0.207543
MCZ27891	Cebus apella	-1.3403	-0.906927	-0.260821	0.5418	-0.169572	0.109728	-0.0194204	-0.470159	-0.526253	-0.141824	-0.0863254	0.222965	-0.301944	-0.0519076	0.188143	-0.0514079	-0.391439	-0.0599873	0.017409	-0.0168348	-0.171132	0.167875	0.250125	-0.125669	0.0646716	0.158229	0.0638181	0.0578002	0.148591	0.0011506	0.19238	0.086909	0.0294111	-0.0123785	-0.159753	-0.189719	-0.131154	-0.0716549	0.023909	0.170047	-0.00319434	0.0340073	0.151962	-0.261141	0.0533864	-0.105896	-0.0207506	0.0313357
MCZ31063	Cebus apella	-0.913268	-0.214173	-0.107162	0.65455	0.409018	0.449678	0.290684	-0.511592	-0.545647	-0.130609	-0.0751348	0.502658	0.143047	0.14036	0.128351	0.107286	-0.0648015	0.0416519	-0.0436096	-0.0135209	0.066632	-0.123519	0.206729	-0.0959952	-0.126174	0.0980752	0.00283005	0.352528	0.264269	-0.114909	0.19291	0.312939	0.0737379	-0.0997981	0.08317	0.0594424	0.128922	0.116541	-0.0741949	-0.024721	-0.0345141	-0.0318223	-0.0483012	-0.0318469	-0.0151187	-0.0710456	0.024248	0.0373155
MCZ37833	Cebus apella	-0.778773	-0.945417	-0.213457	0.311071	0.0171246	0.507413	0.238138	-0.246271	-0.17496	0.0459254	-0.290606	0.140038	-0.0994102	0.254658	-0.159343	0.237697	-0.281512	-0.108664	-0.124486	0.235599	0.102623	0.0906905	0.277197	-0.256865	0.0670282	0.18833	-0.0398092	0.189742	0.0727416	0.0824275	0.135382	0.138341	0.11041	-0.0160859	-0.163415	-0.143454	0.145184	0.0748328	-0.16386	-0.090519	0.0189581	-0.00427338	-0.0685573	0.0379963	0.0128824	0.0398935	-0.10203	0.049135
MCZ41090	Cebus apella	-0.881348	-1.01019	-0.835098	0.152167	0.160156	0.0294993	0.548721	0.0428312	-0.492146	-0.266244	-0.186281	0.120234	-0.499286	0.0213906	0.087212	0.140624	-0.141014	-0.243578	0.129076	0.0829937	0.163621	0.280407	0.056215	-0.070483	0.262208	0.156481	-0.111289	0.0385954	0.23511	-0.093237	0.0266545	0.0906634	-0.270818	0.0562904	0.0585379	-0.0268453	0.169928	0.0247314	0.0306097	-0.106538	0.107759	-0.0395352	-0.104931	-0.107462	0.10074	-0.091283	-0.128225	-0.178624
MCZ49635	Cebus apella	-0.943545	-0.74809	-0.923355	0.253053	0.340717	0.0544193	0.470061	-0.273055	-0.526738	-0.434701	-0.165402	0.165218	-0.042893	0.0330593	-0.107727	0.194752	-0.69829	-0.194743	-0.0190031	-0.0915201	0.381337	0.167464	-0.215979	-0.11199	0.159907	-0.0275949	0.0242852	0.0738424	-0.0860424	-0.0254449	0.281479	0.0836822	0.165994	-0.229414	0.0905228	-0.0867851	0.0940521	0.125208	-0.141704	-0.0442877	-0.0203722	-0.0428424	-0.0879804	-0.017092	0.0553986	-0.00295152	0.0137753	0.0792838
AMNHM52634	Cercocebus galeritus	0.596825	0.277531	-0.191638	-0.0428575	-0.118637	0.213285	0.0708511	0.12683	0.0911765	0.145589	0.069201	-0.20815	0.358323	-0.116945	0.151982	-0.0921296	-0.156748	-0.173956	-0.0181457	-0.163167	-0.0812846	0.0751246	-0.0320122	-0.0097789	-0.179658	0.154733	-0.10285	0.115619	0.0545649	-0.0180299	0.0949212	0.0619328	-0.0636189	-0.0729972	-0.0708499	0.234022	0.0913014	-0.0711347	0.0887737	-0.0618999	-0.00557422	0.139539	0.0862123	0.15199	-0.103772	0.00280516	0.000545249	0.112142
AMNHM52635	Cercocebus galeritus	1.00513	0.0869091	-0.215207	-0.148402	-0.169839	0.0330092	-0.0505581	-0.10637	-0.139921	-0.12562	0.118485	-0.196948	0.274042	0.0448142	0.0467327	-0.0868184	-0.0995398	-0.172211	-0.14413	-0.112186	-0.110812	0.138118	0.00727241	0.0631828	-0.0179561	0.233243	-0.165077	0.0689483	0.0140391	0.0429103	-0.0638039	0.0279631	-0.0645793	-0.0948753	-0.12907	0.218113	0.0895472	-0.0224918	-0.0276961	-0.0556352	-0.0238905	-0.0636029	-0.0145572	0.108925	-0.131395	-0.0524559	-0.10639	0.014623
AMNHM52640	Cercocebus galeritus	1.46563	-0.0019275	-0.11619	-0.288631	-0.293761	-0.225843	0.205074	0.175667	0.0577171	-0.137801	-0.154088	-0.218055	0.107023	0.0602012	0.0470524	0.130487	-0.452941	0.00281932	-0.0650171	-0.289526	-0.0850716	-0.0382133	-0.0864193	0.0251373	0.0596493	-0.0107712	-0.1193	-0.162622	0.0762292	-0.168706	-0.038799	0.0481065	-0.145934	-0.00812397	-0.1644	0.090197	0.110722	-0.114131	-0.117337	-0.154346	0.121156	-0.0567405	0.0996214	-0.0147025	0.0687398	0.0652123	-0.077845	-0.017261
AMNHM52641	Cercocebus galeritus	0.9884	0.1604	-0.363015	-0.0781666	-0.376057	-0.217682	0.0452433	-0.0657077	0.00217032	-0.192324	0.07492	-0.127396	0.212515	-0.00300149	0.0746688	-0.0698307	-0.203679	-0.0961003	-0.13096	-0.186157	-0.108332	0.164028	-0.0464543	0.109306	-0.106556	0.206405	-0.125007	-0.0847329	0.0526307	-0.120544	-0.102332	0.0575479	-0.104642	-0.0380535	-0.170952	0.202838	0.124429	0.0312971	-0.093916	-0.052008	-0.0457728	-0.0049726	0.173413	0.105298	-0.0201688	-0.065231	0.0761861	-0.0600816
AMNHM52645	Cercocebus galeritus	0.304797	0.333711	-0.379098	-0.10603	-0.231243	-0.126657	0.322608	0.0988853	-0.0162587	0.128042	-0.016856	-0.146275	0.239423	-0.10315	0.0365737	-0.0410456	-0.210979	0.0249812	0.176618	-0.127876	-0.215469	0.264091	-0.0343949	0.117847	-0.212644	0.0103565	-0.102002	-0.0316299	0.140239	-0.0187623	-0.061982	0.0354264	-0.123973	-0.0404163	-0.106821	0.090427	-0.0818178	-0.0163895	-0.0735235	-0.137567	0.092679	0.114213	0.207307	-0.039455	-0.0631381	-0.0450886	-0.115232	0.0181883
MCZ22734	Cercopithecus mitis	0.399862	0.43504	-0.033914	0.2068	-0.352477	0.070112	0.443296	-0.232218	-0.159819	0.464754	-0.190428	-0.214256	-0.503495	0.348553	0.139586	-0.0701072	0.238392	0.148826	-0.57567	0.0409575	-0.111756	-0.372552	-0.0747112	0.0314292	-0.0183785	0.0639288	-0.176024	-0.0564839	-0.152001	-0.164668	-0.113484	-0.0738711	-0.0188553	-0.157819	0.0842403	0.0938571	-0.0179053	0.105039	0.0624792	-0.0278212	-0.0619193	-0.0939334	-0.0314798	-0.27607	0.0399615	-0.142644	-0.043153	-0.068583
MCZ25022	Cercopithecus mitis	-0.190394	0.0187122	-0.00586073	0.260862	-0.50463	0.663446	0.366854	-0.348953	-0.00201709	0.482054	-0.0831206	-0.272626	-0.358397	-0.0135509	0.0673299	-0.156955	-0.142739	-0.0719902	0.4895	0.19157	0.0439189	0.107017	0.124206	0.13626	-0.0670898	-0.219485	0.105769	0.0407184	-0.0943392	-0.0175073	0.0114974	-0.0682756	0.141908	-0.0183858	0.178524	0.154755	-0.0916618	0.129958	0.193919	0.0788824	-0.0168524	-0.141529	-0.096788	0.0819807	0.0274728	0.108924	0.0831411	0.0694007
MCZ26832	Cercopithecus mitis	0.603877	0.000488941	-0.279334	0.108591	-0.559964	0.118137	0.203931	0.0316398	0.00354026	0.418178	0.102722	-0.380082	-0.578775	0.0564999	0.382024	-0.280481	-0.178032	-0.252757	0.0293021	0.243989	-0.247898	-0.293083	0.52284	0.336399	0.483094	-0.346995	0.304027	-0.047508	-0.0800771	-0.011446	0.0853072	0.228313	0.12089	0.17571	-0.127105	0.0545429	-0.149147	0.116814	-0.108263	-0.123943	0.226365	0.0185985	0.314773	0.263136	-0.100888	-0.0249393	-0.18033	0.0861602
MCZ39389	Cercopithecus mitis	0.478988	0.191508	-0.307243	0.384816	-0.355897	0.0877306	-0.0761015	-0.296721	0.0169184	0.43693	-0.130013	-0.151617	-0.154756	0.056393	0.0243019	-0.0995225	-0.00843395	-0.230133	0.154638	0.141603	-0.0530305	-0.0878846	0.254382	0.137716	0.116674	-0.201798	0.161754	-0.0555388	-0.07482	0.00671162	-0.0686455	0.168259	0.0278531	-0.0737059	-0.0649478	0.153997	0.197424	0.0575647	-0.0019116	0.23544	-0.0150036	-0.0822455	-0.263967	0.0924866	0.00636777	-0.0191275	0.056966	0.154562
MCZ44264	Cercopithecus mitis	1.08511	0.147101	-0.035574	0.0327717	-0.264931	-0.0579995	0.278794	-0.283263	-0.0869551	0.470647	-0.116532	-0.233588	-0.463107	0.0590746	0.0388656	-0.0229248	0.0520264	-0.163511	-0.00534276	0.177346	0.0335703	-0.207268	-0.127974	0.20781	0.177858	-0.134638	-0.0585344	0.00609831	0.0785503	0.117204	-0.0715702	-0.0785933	0.198403	0.012095	0.221845	0.09711	0.234886	0.00983231	0.0454557	0.00551111	-0.0710296	-0.0783826	-0.0702726	-0.0238416	-0.126193	-0.0613933	0.0361125	0.0934901
SIU4792	Chlorocebus pygerythrus	-1.41895	-0.0315561	-0.54117	0.452067	0.119998	0.45452	0.359784	0.128138	-0.00793908	0.310175	0.0827246	-0.223915	-0.320618	0.155172	-0.0243988	0.100496	-0.118848	0.206476	-0.0536654	-0.111236	-0.227368	0.00754924	0.019713	0.0415148	-0.16005	0.148613	-0.0631961	0.185534	-0.189455	0.114827	-0.0393142	-0.0419721	-0.0708536	-0.047219	0.173073	0.139937	-0.216832	-0.121109	0.268117	-0.0966243	0.00252665	-0.0634925	-0.191694	-0.0278277	-0.00377481	-0.0643509	0.0157602	-0.046715
SIU4793	Chlorocebus pygerythrus	-0.882668	0.271078	-0.815729	0.73011	0.119027	0.494256	-0.0902047	0.00384174	0.195779	-0.0865622	0.156417	-0.325595	0.0520914	0.0542559	0.180494	-0.0154836	-0.0769298	0.00528946	-0.217241	-0.0679056	-0.262758	-0.0878856	-0.0597414	0.0180111	0.0936973	0.126587	0.0141406	-0.0210944	-0.0316532	0.106747	-0.0749047	-0.103483	-0.0250099	0.066912	0.150756	-0.108718	-0.250532	-0.0498025	0.0418349	-0.272781	0.00712317	-0.0474266	-0.0239134	-0.0661844	-0.00229885	-0.0223867	-0.0225284	-0.000419071
SIU4794	Chlorocebus pygerythrus	-0.174695	0.381131	-0.716513	0.699861	-0.0525946	0.518557	-0.0100855	0.0715633	0.223938	0.0607299	-0.0853354	-0.455757	0.109391	0.110951	0.0211633	0.0404559	-0.0157662	-0.193465	-0.112721	-0.01386	-0.162737	0.0109111	-0.186039	-0.010838	0.146516	0.253038	-0.157909	-0.0557468	-0.17691	0.149389	-0.16071	0.0834498	-0.15872	-0.147989	0.148487	-0.0328989	-0.126833	0.00382365	-0.0592079	-0.112845	0.0744526	-0.0620252	-0.109948	-0.00398988	-0.0026021	0.085875	-0.136191	0.00314819
SIU4795	Chlorocebus pygerythrus	-0.786401	0.0137346	-0.496259	0.881178	-0.00266189	0.59719	0.032643	0.286659	0.336106	0.17765	-0.0893609	-0.280842	0.141104	-0.13874	0.224818	0.238241	-0.250329	0.271112	-0.172912	-0.0629149	-0.177012	-0.0200343	-0.106589	-0.134327	0.0464489	-0.0507562	-0.244514	0.189943	0.225586	-0.0333131	-0.148071	-0.140711	0.146283	-0.042941	0.0615832	-0.0562449	-0.197051	0.0319649	-0.078263	-0.217768	-0.025381	-0.100244	0.0321266	0.0471178	-0.107415	0.080814	0.129266	0.0170077
SIU4796	Chlorocebus pygerythrus	-0.229981	-0.15096	-0.45511	0.705278	0.271506	0.346111	0.300706	-0.0052916	0.120972	-0.14119	0.059339	-0.297733	-0.00692087	0.167394	-0.148517	-0.0450934	0.144869	-0.2071	-0.220502	-0.00107276	-0.131145	0.0860447	0.0516544	-0.0226794	-0.144405	0.161538	-0.0165193	0.112713	-0.0550643	0.0107544	-0.0694618	-0.0309826	-0.0353811	0.00134332	0.143282	-0.0354684	-0.0542574	-0.0321616	-0.173742	-0.143745	-0.00416191	-0.0455449	-0.0672655	0.0303416	-0.192305	0.0327359	0.0670861	-0.0676681
AMNHM52211	Colobus guereza	0.898799	-0.242614	-0.48812	0.282601	-0.078825	-0.279351	0.305662	-0.055969	0.461375	-0.0561642	-0.151028	0.0678353	0.0711944	-0.13059	-0.150464	0.00323184	-0.0481327	-0.37716	0.0791745	0.0996047	0.139986	-0.0913863	-0.200914	0.182384	-0.130118	-0.127035	0.115719	-0.0890626	-0.119366	0.0345046	0.0859356	0.0421614	-0.147291	0.207399	0.049371	0.0125276	-0.0874521	0.0396052	-0.0364251	0.0116577	0.0847677	0.0498022	0.256551	-0.0539129	-0.0936261	-0.0686931	0.0251572	-0.032131
AMNHM52213	Colobus guereza	0.795724	-0.375525	-0.539483	0.240785	0.0819781	0.0911246	0.149644	-0.208154	0.306891	-0.170813	-0.0256249	0.0488728	-0.294677	0.0419986	-0.267867	-0.00207533	-0.437803	-0.109685	-0.0388624	-0.0607578	0.0919542	-0.240217	-0.270071	-0.115867	-0.2821	0.0948279	0.0974653	0.0154606	-0.118721	0.0760698	0.0233092	-0.150042	-0.0930665	0.0274872	0.0329304	0.203257	0.124983	0.123977	-0.00713337	0.248132	0.177074	0.073372	0.114478	-0.0165602	0.0179344	0.12329	0.00273087	0.0106681
AMNHM52225	Colobus guereza	0.393782	-0.458562	-0.595739	0.361389	-0.00577496	-0.330266	0.166889	-0.049252	0.496839	-0.243962	-0.0690325	0.0900022	-0.293165	0.153	-0.156015	-0.294831	-0.175786	-0.103403	-0.16883	0.101211	0.086878	-0.152167	-0.191303	-0.225011	-0.541067	-0.0205519	0.0801263	-0.128406	-0.11064	-0.135382	0.0613631	0.0670056	-0.137297	0.0828508	-0.145108	-0.0696045	-0.0539203	0.0151831	0.0842006	0.104971	0.103502	0.064289	0.0632948	0.064098	-0.0547603	-0.106705	0.112422	-0.0604637
AMNHM52237	Colobus guereza	0.955922	-0.668957	-0.258995	0.379108	-0.259713	-0.0898144	0.234265	-0.131394	0.44134	-0.0997158	-0.0833656	0.231141	0.0070749	0.0647613	0.00103881	-0.00781344	-0.20809	-0.254917	-0.0879873	0.283748	0.0240718	-0.176303	-0.433308	0.010719	-0.0634562	-0.0991219	0.214101	-0.00266503	0.215927	-0.0222372	0.28432	-0.0490179	-0.106211	0.254395	0.0401068	0.0270717	-0.129783	0.0313895	0.0414623	-0.0034896	-0.0356162	-0.0197674	0.072352	-0.0148628	-0.237657	0.0621705	0.0539023	0.0192636
AMNHM52249	Colobus guereza	1.92857	-0.313948	-0.268939	0.256199	-0.0453913	-0.387294	0.354347	0.050721	0.479394	-0.203399	-0.23152	0.176138	0.0778937	0.0989444	-0.193686	0.0304314	-0.223694	0.0914992	-0.258066	0.255538	0.222466	-0.296059	-0.458314	0.0351355	-0.0624006	-0.174028	-0.0170966	0.129071	-0.141912	-0.0741644	0.106983	-0.135882	-0.0881798	0.148826	0.0289773	-0.0103286	0.0687295	0.0359963	0.0796949	0.0744848	-0.0163854	-0.0503152	-0.0848389	0.012984	-0.0116805	-0.0666797	0.0837559	-0.0588642
MCZ37280	Erythrocebus patas	0.172149	0.799816	-0.0824721	0.364706	0.130071	0.72788	-0.315635	0.135788	0.517484	-0.187285	0.228878	-0.223846	0.168282	-0.0532039	0.24573	-0.00456582	-0.00640562	0.487876	0.159324	0.046251	-0.0855409	-0.0912476	-0.0383123	0.097226	-0.0978506	0.0962116	-0.0796686	-0.0355824	0.215325	-0.230067	0.172583	-0.0666127	0.0887917	-0.0974222	0.05781	-0.126089	0.120482	0.029982	-0.0834638	0.0732309	0.217562	0.0632171	0.0739024	0.0548988	0.0897363	-0.0311306	0.0835036	0.00333853
MCZ47015	Erythrocebus patas	-0.895967	0.698858	-0.632843	0.591315	0.0554211	0.740683	-0.125089	-0.033794	0.349516	0.100752	0.424918	0.0440142	0.168008	-0.147726	0.0840156	-0.03477	0.185527	-0.0390032	0.111334	0.279282	0.0475243	-0.120447	-0.0503671	0.263877	-0.195418	0.095609	0.0406309	0.0274938	0.0670662	-0.0515639	0.0510858	-0.0925217	0.0589131	-0.0810126	0.00615755	-0.153004	0.25159	-0.00883826	-0.0925182	0.0616056	-0.0157993	0.0244061	0.028037	-0.168585	-0.0465888	-0.0833659	-0.0408903	0.00694914
MCZ47016	Erythrocebus patas	-0.566989	0.788207	-0.429992	0.427176	0.0473271	0.786183	0.0828624	0.020555	0.179603	-0.0873359	0.413775	-0.087275	0.144118	-0.0154422	-0.0708394	-0.0513036	0.253385	0.0418657	0.0180004	0.268074	0.037808	-0.165299	0.12351	0.269134	-0.0398307	0.0991158	-0.00859776	0.00104692	-0.104492	-0.18169	0.162602	-0.138907	-0.0259771	-0.104524	0.0168449	-0.134208	0.0430913	-0.0460812	0.0314546	0.123419	0.0787174	0.0311434	-0.0166153	-0.0556346	0.2439	0.0364042	-0.0858407	0.0538527
MCZ47017	Erythrocebus patas	-0.451438	0.449039	-0.3919	0.443439	-0.190978	0.454255	-0.174235	-0.189509	-0.0784273	0.160205	0.168184	-0.0612701	0.157095	-0.0679848	-0.0804376	-0.0993078	0.22993	0.047532	0.0546766	0.183864	0.105164	0.162096	-0.0143589	0.35112	0.154604	0.206032	-0.108112	0.0222273	0.182928	0.0101214	0.114898	-0.199106	-0.275179	-0.140039	-0.0920543	-0.339167	0.0074217	-0.0302913	0.0562549	0.151354	-0.0173751	0.188759	0.0188401	-0.00491969	0.0619052	-0.00691578	-0.0394852	0.00820021
MCZ47018	Erythrocebus patas	-0.186721	0.818069	-0.294895	0.135184	0.114629	0.534338	0.034351	0.142902	0.113863	0.091966	0.265596	-0.094063	-0.0768718	0.103701	0.100645	-0.0282588	-0.100645	0.197302	-0.0288951	0.0600127	-0.0110523	-0.0499143	0.214603	0.264593	-0.0364987	0.205626	0.036597	-0.201982	-0.0577784	-0.0803612	0.0240448	-0.113031	-0.051808	-0.0520687	0.0803603	-0.0511626	0.317707	0.004386	-0.0706193	-0.0105342	-0.140882	0.0342588	-0.0453073	-0.0362571	0.0904421	-0.0958773	0.0419264	0.0211138
AMNHA999686	Gorilla gorilla	-1.46035	1.1015	-0.360331	-0.102244	0.120837	-0.533187	-0.386751	0.218482	0.00411846	0.543647	-0.134904	-0.0395268	0.430084	-0.474199	-0.203258	0.479899	-0.375394	0.223919	0.410879	0.315824	-0.130968	-0.219409	-0.090248	-0.0280807	0.0781389	0.301491	0.194019	0.13173	-0.450063	0.139822	0.0763628	0.293659	-0.129333	-0.0537889	-0.0768487	-0.0159837	0.0947565	-0.0303664	0.273828	-0.0469862	-0.199173	-0.352783	0.141305	-0.0170574	0.0139516	-0.0129061	0.175288	-0.0623773
AMNHA999687	Gorilla gorilla	-2.18996	1.18939	-0.24427	-0.119079	-0.295416	-0.918466	-0.734376	-0.370593	-0.0192831	0.0456779	-0.607217	-0.108404	-0.0326432	-0.276649	-0.0713105	0.105185	0.196422	0.0302679	-0.000182063	0.0776804	-0.300978	-0.102598	0.252916	-0.164697	-0.20641	0.122209	0.271254	0.129153	0.176392	-0.0647975	0.261551	-0.274346	-0.438134	0.157835	-0.216003	0.358034	0.125205	-0.205018	-0.0344768	-0.0551387	0.237859	-0.0195592	-0.101507	0.00890051	0.206095	-0.0942539	-0.0563068	0.266576
AMNHM167338	Gorilla gorilla	-1.35249	1.18514	-0.48803	0.0856308	-0.269592	-0.430793	-1.06526	0.590064	-0.110308	-0.0611206	0.260841	-0.250897	0.102812	-0.191326	-0.0921152	0.0164264	-0.0981417	-0.24741	-0.0743406	0.0268048	0.049175	-0.0088438	0.0501406	-0.0834989	-0.435503	-0.202794	-0.234564	-0.424097	0.38846	0.082664	0.345627	0.440554	0.252806	0.116974	0.226672	-0.0679924	0.0523742	0.000242247	0.32075	0.0380485	-0.0380341	0.0341155	-0.185265	-0.126573	-0.132139	0.137149	-0.100995	0.151645
AMNHM54356	Gorilla gorilla	-3.17697	0.733962	-0.0609167	0.0417783	0.107387	-0.641604	0.588741	-0.0321557	-0.599728	0.0138627	-0.323989	0.0949401	-0.381343	-0.270633	0.181165	0.457353	0.0302768	0.138095	0.268667	0.403481	-0.274741	-0.400813	-0.241457	-0.20293	-0.298249	-0.342469	-0.00701905	0.0386519	-0.00404991	-0.168761	-0.413489	0.0891399	-0.0139004	-0.241347	0.0859068	-0.199048	0.128695	-0.270195	-0.132069	0.124934	-0.0669323	0.247623	0.0217906	0.368273	-0.21148	-0.0567	-0.12851	-0.156223
MCZ17684	Gorilla gorilla	-0.711394	1.15861	-0.811537	-0.289687	-0.363645	-1.03003	-0.570357	0.218274	-0.175362	0.250425	-0.481238	-0.385356	-0.189125	-0.175308	-0.469761	0.334618	0.0354574	0.0165281	-0.106253	0.181017	0.399368	-0.095482	0.158621	-0.0756099	0.214755	0.0283084	-0.471089	-0.112435	0.00826602	0.0866598	0.126031	-0.21316	-0.10891	-0.0661444	-0.00737944	-0.0870078	-0.42233	0.0226413	-0.244432	-0.0339732	-0.0884202	0.0684709	-0.0151552	0.0261582	0.0108565	-0.141072	0.198669	0.0950995
MCZ26850	Gorilla gorilla	-2.10623	1.28582	0.0151083	0.187801	-0.445147	-0.491431	-0.647593	-0.29166	-0.514393	-0.21067	-0.0546004	0.141097	0.103607	-0.438148	0.12496	-0.0282919	-0.0647812	-0.226208	-0.100046	0.164633	0.277713	-0.00759417	-0.0228853	0.306206	-0.0353462	-0.122914	-0.138271	0.143757	0.055263	-0.267871	-0.206109	-0.0615111	0.155922	0.0709765	0.033638	0.096929	0.0717569	0.0822348	-0.0899112	-0.143823	0.214986	-0.165708	-0.128636	0.0259223	0.0510455	0.279133	-0.102914	-0.308581
MCZ37264	Gorilla gorilla	-0.547259	1.45988	0.332303	0.0366182	-0.408795	-0.451904	-0.843384	-0.477346	-0.229288	-0.20637	0.148001	-0.0353662	-0.190012	-0.145825	-0.314695	-0.318245	0.0231187	0.0908889	-0.480395	0.347306	0.148797	-0.203894	0.00982746	-0.281689	-0.11102	0.0989393	0.176039	0.0208351	0.0203964	0.154508	-0.0477005	-0.0158863	0.131967	0.271963	0.201668	-0.153219	-0.0264013	0.0311438	-0.198497	-0.184627	-0.034521	-0.147389	0.17458	-0.18382	0.00994698	0.0872305	-0.0940122	-0.0182847
AMNHM112673	Hoolock hoolock	0.0341967	-0.0519774	0.13391	0.094604	1.03709	-0.093627	-0.322482	0.00185735	0.0203587	0.434348	-0.0498715	0.536929	-0.018007	0.163313	-0.340711	-0.106909	-0.0275814	0.0735193	0.0184582	-0.33577	0.0813074	-0.28007	0.0206667	0.101809	-0.0256043	0.0463087	0.0050692	0.0707994	0.158445	-0.052099	-0.178726	-0.013157	0.0818798	-0.0299818	0.0527043	-0.0316996	-0.054373	0.00258708	-0.0301645	-0.219339	0.265879	-0.0821578	-0.0231071	0.13241	0.171372	-0.134977	-0.0260087	0.00209906
AMNHM112720	Hoolock hoolock	0.364704	0.369395	0.22039	-0.132052	0.814379	-0.218495	-0.178427	-0.444519	-0.227942	-0.163164	-0.0445535	0.393363	-0.352885	0.0809159	-0.0400478	-0.239757	0.237011	0.0967285	0.294625	-0.228973	-0.00653023	-0.0782454	-0.233044	0.208381	-0.0830143	-0.0107522	-0.214526	0.154965	0.00681451	0.121576	0.0842945	0.13929	-0.0536511	-0.091938	-0.0748948	-0.105728	-0.218215	0.0464789	0.00331353	-0.00895026	0.0331742	-0.0790076	-0.0134853	-0.0491746	-0.103721	0.0142674	-0.0950375	0.205346
AMNHM112983	Hoolock hoolock	-0.436674	-0.254328	-0.192472	0.485345	0.828152	0.175289	-0.536315	0.0243485	0.351555	0.160996	0.100958	0.334753	-0.259433	0.122458	-0.392722	-0.116178	0.143989	-0.117654	0.296369	-0.214728	-0.0618744	-0.0747244	0.029264	-0.0204327	-0.167667	-0.0839998	-0.113927	0.242175	0.143205	0.148134	0.065484	-0.0911593	0.0266003	0.026282	-0.0735825	0.00236917	0.0564658	-0.138857	0.151387	-0.0177914	0.162462	-0.0799698	-0.0682625	0.0928625	-0.000984498	0.0908269	-0.00915485	-0.133877
AMNHM201742	Hoolock hoolock	0.229347	0.0991796	0.0130365	0.241683	0.816041	-0.257638	-0.580021	-0.0461067	0.481383	0.44078	0.0362375	0.264721	-0.263638	0.237354	-0.267006	-0.254652	-0.00496587	0.170094	-0.0156725	-0.118631	0.187194	-0.0260535	0.0934335	-0.0507542	0.501898	-0.342601	-0.176659	0.47236	-0.0265618	-0.561031	-0.0257495	0.274941	-0.139043	0.0623842	0.279919	0.188204	0.0632843	-0.434162	-0.052963	-0.0311057	-0.294528	0.242008	0.231804	-0.207246	0.0702433	0.167827	0.0207296	0.0977262
AMNHM83421	Hoolock hoolock	-0.136738	-0.117663	-0.488961	0.359918	0.730423	-0.0364389	-0.405974	0.0613601	0.0330997	-0.102155	0.270744	0.189983	-0.380688	0.352609	-0.323373	-0.0968666	-0.0583145	0.0843395	0.218296	-0.274805	-0.19438	-0.233197	0.0222752	0.101359	-0.0497815	-0.10148	-0.0760176	-0.152303	0.122643	0.104474	0.0307822	-0.0604818	0.0637961	0.276432	-0.214687	-0.215338	0.000367117	0.102845	0.0241083	0.0144028	-0.11488	-0.20082	0.0734394	0.171485	0.0403889	-0.06957	-0.0930394	-0.121844
AMNHM83425	Hoolock hoolock	0.480604	-0.517613	-0.00400744	-0.0353706	0.607998	-0.404277	-0.604177	0.0493477	-0.0446477	-0.0663973	0.170317	0.15779	-0.474147	0.259665	-0.070714	0.0172258	0.0395627	0.0897048	0.159929	-0.44141	-0.119915	-0.133813	0.0645623	0.433144	-0.187951	-0.0559744	-0.120183	-0.131412	0.00866116	-0.0683182	0.0805165	-0.0947675	-0.101184	0.14485	0.0192647	-0.019261	0.143781	0.0366768	-0.14685	-0.0984923	-0.196873	-0.200207	-0.182136	0.192067	-0.0778185	-0.0108559	0.0732317	0.0147502
EMBR121	Homo sapiens	-1.80421	-0.0396176	-0.902623	-1.05229	0.328204	0.320969	-0.496855	-0.538164	0.00084884	0.150895	-0.169462	0.241976	0.493566	-0.215504	0.00850985	0.0825768	-0.1749	-0.347815	-0.205703	-0.236816	0.24804	-0.140181	0.0270869	0.427787	0.296401	0.024755	-0.0823056	-0.264699	0.22595	-0.193248	-0.155466	-0.0232518	0.130809	-0.114289	-0.0931785	0.14109	-0.0671522	0.00240069	0.187753	0.354513	0.027507	-0.0769494	0.185471	-0.121237	-0.216856	-0.137053	0.086659	-0.16309
EMBR179	Homo sapiens	-1.39025	-1.01635	-0.74086	-1.46685	0.230757	0.232374	-0.20918	-0.122306	0.0237171	-0.0487289	0.160424	-0.111365	-0.211981	0.0566123	0.30566	-0.204008	0.106658	-0.127112	-0.184577	0.067458	-0.0918472	-0.0638086	-0.375759	-0.0263328	0.138997	-0.123056	0.0673676	-0.249528	-0.275759	-0.0303071	0.0198195	-0.150297	0.0158034	-0.0921941	-0.0951602	-0.112179	0.303251	-0.216488	-0.264173	-0.076835	0.179034	-0.0917115	-0.144034	-0.131467	-0.015586	0.320221	0.203937	0.221052
EMBR212	Homo sapiens	-1.614	-0.7707	0.322483	-1.62868	0.352581	0.903106	-0.5349	-0.825802	0.127335	-0.465573	0.00191936	0.183154	-0.00172496	-0.323611	0.408573	-0.165853	0.0466221	0.300648	-0.438941	0.0988838	-0.450019	0.012647	0.0656581	-0.105659	-0.0802502	0.0193035	-0.308368	0.1299	-0.0394557	0.134505	-0.0085052	0.215875	-0.172083	0.253295	0.261299	0.230791	-0.248384	0.15044	-0.100271	0.279477	-0.0250892	-0.124481	-0.0142972	0.152771	0.0539008	-0.0869673	0.0339565	-0.0276484
EMBR215	Homo sapiens	-2.22214	-1.3699	-0.808546	-1.7762	0.251104	0.601413	-0.103085	0.126427	0.741895	0.356821	-0.396026	-0.342908	-0.125441	-0.244171	-0.152057	-0.091467	0.132905	0.034834	0.0980806	0.252957	-0.00934682	0.239268	-0.0577613	0.0132098	-0.233355	-0.156039	-0.131138	0.171986	-0.0819538	0.046462	-0.152182	0.214714	0.31382	0.0996365	-0.0559788	-0.114952	0.149526	0.24151	-0.0345816	-0.277351	0.0500311	0.22638	0.0287232	-0.0941598	0.112671	-0.0756516	0.0480995	-0.048549
EMBR281	Homo sapiens	-2.00981	-0.766566	-0.973793	-1.59268	0.401994	0.364087	-0.168373	-0.511906	0.379959	-0.059033	-0.0501834	0.1454	0.325035	0.0390183	-0.101133	0.0504733	0.160114	0.0201678	0.0472041	-0.0430199	0.122506	-0.038786	0.007895	-0.0213243	0.220593	0.110115	0.236402	-0.292904	-0.216085	-0.283604	0.103829	-0.0334655	-0.0227669	0.0388797	-0.0613442	-0.123141	-0.0959211	-0.101398	0.272891	-0.284298	-0.0477885	0.0108593	-0.131796	0.130775	-0.0919084	-0.0500889	-0.220213	-0.0566261
MCZ41411	Hylobates lar	0.379467	0.145742	1.10492	0.0218267	0.83986	0.254523	0.124981	-0.259425	-0.568869	-0.0233347	0.0721848	-0.333978	-0.0386958	0.00461044	-0.0546161	-0.0543655	0.000632923	-0.099024	0.00233012	0.315671	-0.0919652	0.0586517	0.042572	-0.0367218	-0.0976771	0.0451057	-0.0385636	-0.341526	0.0180951	0.00236062	-0.0758641	-0.0150278	-0.0829386	0.140839	-0.0221222	-0.0290506	0.103437	0.145127	-0.0355276	-0.128727	-0.155853	0.118097	0.179798	0.047099	0.101654	-0.0116819	-0.00359294	-0.0134762
MCZ41412	Hylobates lar	0.572852	-0.0469197	0.882502	0.311811	0.865644	0.394536	0.0592051	-0.131577	-0.228089	-0.00236597	-0.226003	-0.222797	0.0939161	-0.0824431	-0.212598	-0.00920897	0.148144	-0.0930295	0.0255056	-0.0872718	-0.0255845	0.0910197	-0.0839498	0.00808618	-0.00127569	-0.131031	-0.181686	-0.228918	0.0101434	-0.100386	0.164239	0.0720021	-0.0616116	-0.0423263	-0.121235	0.0285233	-0.0565365	0.0243926	0.13487	-0.13277	0.0179762	0.116389	-0.0534941	-0.0183247	0.0345911	0.133536	0.0833557	-0.022728
MCZ41416	Hylobates lar	1.4324	0.286001	0.982945	-0.306828	0.761705	0.398256	0.189462	0.0613255	0.0661631	0.121707	-0.212734	-0.25499	0.124315	0.200174	-0.398638	-0.00264798	-0.0509876	0.173525	-0.103187	0.331151	0.0407835	0.10596	-0.0425064	-0.230615	0.136688	-0.0690555	0.100381	-0.146735	-0.0676987	-0.0768465	0.0805855	-0.0731886	0.256703	-0.0510397	-0.0516035	0.0145967	-0.0751678	-0.144955	0.0452939	0.145785	0.263555	-0.0365081	-0.0389551	-0.0784445	-0.0448902	-0.22017	-0.147114	-0.039564
MCZ41418	Hylobates lar	1.17369	0.350891	0.754904	-0.0109065	0.788194	-0.000684249	0.0107343	-0.142102	-0.244404	0.197439	-0.116519	-0.210151	-0.059069	0.0835661	0.174094	0.0307855	0.170216	-0.0970932	-0.0127448	0.0898166	0.0174466	-0.0425073	-0.313181	-0.0323769	0.1307	-0.100081	-0.12769	-0.0978013	0.114418	0.109422	-0.00908661	0.0811122	-0.18653	1.14e-05	-0.138092	0.0830397	0.0405435	0.114957	0.200658	0.00482139	-0.043995	-0.0372808	0.0261992	-0.144689	-0.0481351	0.208038	0.00181985	0.0821544
MCZ41421	Hylobates lar	0.763718	0.36832	1.06779	0.0745159	0.983214	0.462816	-0.0919852	-0.302846	-0.40991	-0.0382709	-0.116148	-0.240928	-0.0638361	-0.036681	0.0339168	0.00675745	-0.0991365	0.16291	0.156272	0.365811	-0.0894702	0.141979	-0.335131	-0.0579356	0.109227	0.0504567	0.00997587	-0.134253	0.04832	-0.0943157	-0.052438	-0.119141	-0.0413137	0.078168	-0.0559502	0.129331	-0.0165886	0.115051	0.0593798	-0.0889752	-0.00103072	0.0198067	-0.0885289	0.0276508	0.0284633	0.0478983	-0.0122399	0.0519272
MCZ41424	Hylobates lar	0.311993	0.129905	1.1101	0.173848	0.923065	0.37292	0.0453695	-0.0999014	-0.410508	0.0360517	-0.0605686	-0.386894	0.224657	-0.139326	-0.256009	-0.102782	-0.0492873	-0.0808977	-0.0892124	0.273446	0.0706563	0.0859955	-0.10543	-0.0897573	0.00901562	-0.0209921	-0.0480478	-0.0546119	0.0462316	0.000101384	0.166879	-0.0789569	0.0577352	0.167569	-0.168336	0.124312	0.123539	-0.0440657	-0.0330397	-0.0660704	-0.158908	0.112904	0.0699581	0.0861599	-0.0525596	-0.0536263	-0.141436	0.044553
MCZ41452	Hylobates lar	0.73537	0.4454	1.02767	-0.181498	0.65589	0.351471	0.0565932	0.118304	-0.283525	0.10562	0.0340481	-0.287434	-0.0468694	0.085907	-0.189514	0.135622	-0.11668	0.153401	-0.102063	0.0934759	0.174766	0.0169988	0.219613	-0.0206845	0.159068	0.154517	0.0584299	-0.0560467	-0.144087	-0.0431344	0.158704	-0.0417149	0.0468759	0.102478	-0.0304411	-0.0110464	-0.150188	-0.231699	-0.0107279	-0.0537412	0.224229	0.010562	-0.000230505	0.082201	-0.0684392	-0.158186	0.186787	-0.101074
AMNHM52596	Lophocebus albigena	0.850942	-0.08892	-0.196286	0.18372	-0.318885	0.222964	0.119821	-0.1551	-0.00345134	-0.0663961	0.119598	-0.065065	-0.00697681	0.0847115	0.0270305	-0.164499	0.0751309	-0.111173	-0.0445538	0.0371736	-0.0697992	0.0402288	0.123085	-0.00846809	-0.0727586	-0.0437793	-0.0920988	0.100972	-0.138026	0.140545	0.174045	0.112306	0.0816057	-0.134508	-0.0748088	-0.0186921	-0.0116867	-0.143861	0.00923827	0.0463754	-0.122294	-0.190547	0.0941137	0.0824859	0.0255347	0.0590645	-0.0297671	0.112199
AMNHM52603	Lophocebus albigena	0.687503	-0.061536	-0.514205	0.118488	-0.186799	-0.121553	0.0503517	-0.0992292	-0.0145284	-0.542143	0.132694	0.0174772	0.233978	0.0317453	-0.151591	-0.346308	0.320495	-0.205287	-0.0139077	0.167914	-0.192119	0.0919054	-0.219733	-0.0912356	-0.101681	-0.185919	-0.195166	0.0513824	-0.204599	-0.0337054	0.0813354	0.10007	0.0109502	-0.20363	-0.100114	0.0288438	0.0445592	-0.203381	-0.116168	-0.0122104	-0.207585	-0.169625	0.0734613	0.154385	0.189115	-0.151397	-0.0429276	0.0925115
AMNHM52606	Lophocebus albigena	1.01873	-0.0783557	0.0107375	0.0108539	-0.300022	0.0790777	0.19724	-0.18436	0.140712	0.00125136	-0.0605055	0.0231668	0.0154111	0.0288267	-0.139595	-0.166813	0.119453	-0.152579	-0.0723064	0.127926	-0.177269	0.149169	0.229531	-0.0315581	-0.118748	-0.135123	-0.0299811	0.177576	-0.00158744	0.07063	0.0653654	-0.0805647	-0.0225628	-0.131919	0.01305	-0.0703979	0.0387333	-0.157543	0.0103183	-0.0269758	-0.0671409	-0.152534	0.0892055	0.0797861	-0.00066377	-0.0158544	0.0260579	0.011998
AMNHM52607	Lophocebus albigena	1.49826	-0.114415	-0.00204803	-0.17379	-0.451648	0.0713055	0.0726245	-0.0448509	-0.128961	0.0178458	-0.171088	0.0269152	0.139394	-0.0049709	-0.0959565	-0.158861	0.124633	0.0836094	0.00548996	0.137146	-0.00819536	0.116242	-0.0733424	-0.128227	0.123864	-0.151671	-0.0921237	0.00286426	0.0489536	-0.00101197	-0.0253058	0.00573438	0.121102	-0.114884	-0.0703469	-0.125282	-0.0385534	-0.0695683	0.0225585	0.131041	0.0461495	-0.214261	0.0709506	-0.00131564	0.0848869	-0.00441222	-0.0589734	0.0917239
AMNHM52615	Lophocebus albigena	0.943007	-0.190987	-0.270679	0.233262	-0.233035	-0.0448019	0.204172	-0.0905991	0.119271	-0.112973	-0.147427	0.114023	0.324615	-0.129897	-0.142156	-0.162531	0.342179	-0.034126	0.202267	0.0423686	-0.0308784	0.201722	-0.103653	0.0880788	-0.0653281	-0.100562	-0.21993	0.0763525	-0.0721664	0.0298237	0.0555556	0.163317	0.169595	-0.19741	-0.1105	0.0969701	-0.208732	-0.143232	-0.150214	-0.0275563	-0.0964215	-0.185763	0.10332	-0.0233237	0.0699081	0.0212057	-0.0325813	-0.0809088
MCZ12758	Macaca fascicularis	-0.0877135	0.209589	-0.633904	-0.307172	-0.338684	-0.118921	0.190095	-0.128704	0.156804	0.0804172	-0.139629	-0.0942138	-0.109401	0.277114	0.0688392	0.0716928	-0.186577	0.266734	-0.0378633	-0.207061	0.0260649	-0.15342	-0.177712	-0.169357	0.05783	-0.0219322	0.00451143	-0.0979584	0.00964751	0.152931	0.0842008	-0.122825	0.0131416	-0.0360331	0.131523	0.0551885	0.112117	0.0475032	0.00597417	0.131913	-0.147421	0.307464	-0.0177909	0.0549451	0.315582	0.0920132	-0.193269	-0.083124
MCZ22277	Macaca fascicularis	1.10783	-0.0169089	-0.189049	-0.143407	-0.417384	-0.278254	-0.129277	-0.51457	0.0998786	0.0842104	-0.0956733	0.00492659	-0.250772	0.207827	-0.126549	-0.0543356	0.261946	0.000607	-0.29334	-0.116965	-0.0298346	-0.0517313	-0.00761869	0.206407	0.226903	0.251648	0.127522	-0.00659172	0.187428	0.247006	-0.00771723	-0.0273416	-0.00805729	-0.134131	-0.0670016	0.0761085	0.123042	-0.000122112	-0.0210617	-0.0116065	-0.113557	0.217746	-0.0188281	-0.0494657	-0.0214954	0.00611994	0.0456934	-0.13016
MCZ23812	Macaca fascicularis	-0.280223	0.200152	-0.14914	-0.170945	-0.166912	-0.114029	0.179083	-0.327229	0.0418117	0.422515	0.0287187	0.143623	0.404805	0.114874	-0.206695	0.0477425	-0.200864	0.038209	0.0102383	-0.0136772	-0.13673	-0.153079	0.00856725	0.062248	0.000623372	0.0454361	0.311889	0.0136704	0.200912	0.253647	-0.10973	0.138426	0.0881643	0.13272	-0.195506	0.0145074	-0.109384	-0.00183055	-0.0311291	0.025425	-0.274855	0.237598	-0.153108	0.0689775	0.13055	0.0148911	-0.0160352	-0.0823741
MCZ23813	Macaca fascicularis	0.743211	0.423937	-0.340025	0.0337175	0.0808845	-0.108975	0.084862	-0.186095	-0.0146299	0.0491294	-0.129198	-0.0717188	0.135864	0.199856	0.0807217	0.032302	-0.115429	0.0403296	0.0376134	-0.158133	-0.0586501	-0.311718	-0.333195	0.232826	0.169565	0.0646928	0.1126	-0.172572	0.150793	0.361768	-0.059392	0.216785	0.0468004	-0.00351184	0.0545832	0.128095	-0.0904806	0.0380623	-0.114528	-0.0945924	-0.180006	0.11802	0.00711367	0.0726938	0.230157	0.00863184	-0.0839123	-0.0020285
MCZ35765	Macaca fascicularis	0.72432	0.0415822	-0.38018	-0.297904	-0.113406	0.0511886	0.104791	-0.141471	-0.165581	-0.00229397	-0.183219	-0.196671	0.0838004	-0.0824843	-0.30746	0.0924979	-0.00301479	0.00843428	0.176455	-0.218945	0.15767	0.117087	-0.0870429	0.0597095	0.147427	0.0610499	-0.137968	0.0502524	0.0818196	0.347389	-0.0597122	-0.150153	-0.00834914	0.107323	0.237697	-0.00163575	-0.0421918	-0.184498	-0.0187335	0.246702	0.183657	0.118305	-0.0530323	0.103315	-0.0146378	0.059127	-0.15521	0.0721022
AMNHA9912049	Mandrillus sphinx	0.655562	-0.279817	-0.218553	-0.19588	-0.389584	-0.271537	0.293247	-0.417969	0.264029	0.0564984	-0.200299	0.00675675	0.0931932	0.173885	-0.204432	0.0701913	-0.0352787	0.200948	0.0523456	-0.0181021	-0.030166	0.235044	0.0716933	-0.0144819	-0.0520701	-0.115964	0.229047	0.100276	0.346492	-0.153338	-0.11101	-0.176614	0.0486193	-0.0259232	-0.0922406	-0.119796	-0.0166962	-0.00429927	0.162523	-0.169992	-0.021251	-0.0785592	-0.117062	0.0270145	-0.0664381	0.141781	0.0255112	0.143409
AMNHA9912056	Mandrillus sphinx	0.71749	0.616985	-0.145477	-0.389969	-0.056574	-0.0419762	0.160865	-0.374729	-0.15737	-0.0819369	0.226269	-0.181142	0.160681	0.069926	-0.103521	-0.146476	-0.194228	0.0999016	-0.303927	-0.259151	0.239404	-0.0238149	0.144831	-0.0494979	-0.228176	0.174179	0.1473	0.0530602	0.0406618	-0.0853095	-0.135058	-0.0583408	0.198335	0.0224853	0.11607	0.00166553	0.0475809	-0.0331997	0.0956132	0.095813	-0.0524297	-0.0663671	0.0976752	0.121067	-0.109725	-0.0153367	0.0367357	0.14707
AMNHM89362	Mandrillus sphinx	0.668286	0.386035	0.0698812	-0.403424	0.0307182	-0.150323	0.186352	-0.316939	-0.138453	0.0516571	-0.0952355	-0.155984	-0.151215	0.0596294	-0.0837246	-0.00138966	-0.0866822	0.0570085	-0.175684	-0.220225	0.0928141	0.200144	0.111375	-0.153497	-0.253589	0.0983459	0.123867	0.0194287	0.0969058	-0.079888	-0.384141	-0.106564	-0.0340712	-0.0318436	0.158976	-0.0458637	0.0996289	0.0645033	0.128947	0.0122149	-0.0387229	-0.0716604	-0.0349933	0.00130369	-0.111605	-0.107743	-0.00118224	0.120312
AMNHM89364	Mandrillus sphinx	1.39001	0.605566	-0.0828947	-0.909153	-0.15946	-0.308164	0.205885	-0.17163	0.0701226	-0.333938	0.361838	-0.259978	-0.0886345	-0.0132381	0.0123718	-0.140997	-0.0427612	0.268086	0.16199	-0.0441175	0.134327	0.04508	0.134479	0.08526	-0.200654	-0.0417406	0.163351	0.168146	0.0626218	-0.104192	-0.0468327	0.0462285	-0.118505	-0.127061	0.0256327	-0.175931	-0.0653785	0.0857538	-0.0250543	-0.190189	0.0511619	0.00986225	0.110467	-0.131697	-0.00579418	-0.0796268	-0.0676768	0.0689978
AMNHM89365	Mandrillus sphinx	0.634748	0.0314624	0.136833	-0.0786944	-0.340773	-0.356351	0.397695	-0.566183	-0.0819765	0.115213	-0.134234	0.0595662	0.213488	-0.0212654	-0.171494	-0.169072	0.238207	0.0655867	0.060438	0.0434609	0.172873	0.344277	-0.171235	0.128381	-0.0827823	-0.0753596	0.0614076	0.0327254	0.16168	-0.0442267	-0.196334	-0.0278103	-0.0275696	0.0401102	0.185351	-0.0863443	-0.150839	-0.0951143	-0.0195205	-0.0344819	-0.107246	0.0504565	-0.0493328	0.0709932	-0.012968	-0.110807	0.0206669	0.0227966
MCZ19976	Miopithecus talapoin	-0.417991	0.10616	-0.276315	0.289454	0.293142	0.227419	-0.0542857	0.15178	-0.113884	0.530381	0.0288221	0.0701165	0.0477412	-0.324869	0.130449	-0.126367	-0.0062962	0.140809	0.14393	-0.263041	-0.155446	0.110142	0.0407753	-0.180018	-0.101708	-0.0144732	-0.0021047	-0.0621238	-0.0145597	0.0567674	0.129392	-0.0321489	-0.0874645	-0.0310666	0.0285143	-0.00757397	-0.063085	0.105017	-0.0320894	0.017852	0.0952995	0.148534	0.0469003	-0.0323437	-0.137317	0.075602	0.0308169	0.010444
MCZ23196	Miopithecus talapoin	0.00536442	0.0820933	-0.348482	0.564415	-0.267543	0.23924	-0.130994	-0.0590077	-0.0872113	0.564216	-0.0881325	0.302147	-0.0157113	-0.0792619	0.217699	-0.248721	0.0713763	0.2699	-0.160421	-0.0777837	-0.136347	0.301762	-0.055624	-0.396762	0.139865	-0.230465	-0.0373185	-0.173788	0.000564829	-0.094672	0.0548414	-0.152063	-0.161832	0.123437	-0.126385	-0.116189	-0.0127447	0.185488	-0.0999574	0.0458233	-0.0976522	-0.00698288	-0.0242144	0.0466476	-0.161423	0.0222563	-0.00966801	-0.0238959
MCZ23197	Miopithecus talapoin	0.093318	0.201316	-0.275123	0.338072	-0.286369	-0.247494	-0.134232	0.00530226	-0.286366	0.789724	0.0859655	0.16897	-0.00836523	-0.198396	0.197448	-0.245572	0.0111849	0.199452	0.0857215	-0.321534	0.0646568	0.386181	-0.204561	-0.181576	-0.022195	-0.0192524	0.120425	-0.157242	-0.195457	-0.162833	-0.0608548	0.197074	-0.00668015	0.112938	-0.214698	-0.0210902	0.0145767	0.101016	-0.0953489	0.0819501	0.00349305	0.00527492	-0.00953459	-0.0570513	0.0875314	0.0454835	0.0747	-0.0882148
MCZ34264	Miopithecus talapoin	-0.0559965	0.130575	-0.338306	0.413633	-0.0240514	0.0384944	-0.116316	-0.0461419	-0.150485	0.670799	-0.0507005	0.113095	0.103163	-0.0623565	0.141432	-0.104902	0.0682244	0.400786	-0.0389408	-0.326713	-0.0479959	0.0724027	-0.145439	-0.22324	-0.0841757	-0.0144092	0.084111	-0.0360934	-0.134741	0.00952829	0.0776084	0.0355251	0.0250135	0.0446846	-0.134114	-0.0553282	-0.0127817	0.0721225	-0.0603732	0.106751	0.116384	0.140386	0.0064563	-0.0257313	-0.0260211	0.037304	0.0620609	-0.022644
MCZ37278	Miopithecus talapoin	0.0980187	0.305643	-0.578953	0.583464	-0.185855	0.0451718	-0.087306	-0.024422	-0.184632	0.540767	-0.10395	-0.153588	-0.123977	-0.180293	0.00514368	-0.273517	0.173605	0.171212	-0.0249408	-0.161698	0.284182	0.254266	-0.196786	-0.0335956	-0.00147259	-0.00388953	-0.216379	0.0572853	-0.182831	-0.0447596	0.0403521	-0.0557481	0.00971179	0.140999	-0.0162287	-0.0114282	0.0060283	0.0706938	-0.0431871	0.222048	0.135185	-0.0384004	0.0358784	0.0770781	-0.00640769	-0.118032	-0.0522452	-0.126496
MCZ37342	Nasalis larvatus	0.241173	0.363033	-0.525139	0.251621	0.169496	-0.35386	-0.0830811	0.0356019	-0.23988	-0.179309	0.230207	0.518002	0.111721	0.42622	0.079555	0.175785	0.248528	0.153381	-0.0246049	0.236528	-0.0172016	0.272122	-0.0035006	0.0698151	0.0114673	-0.24817	0.0678391	-0.173357	-0.133694	0.0650858	-0.106427	0.0902108	0.0222767	-0.0608256	0.121249	0.133018	0.0911119	-0.065207	0.0468319	-0.0325187	0.0929414	0.164759	-0.159058	0.00454849	-0.162864	-0.229965	0.10634	0.0790224
MCZ41555	Nasalis larvatus	1.00514	0.521507	-0.219194	-0.0441061	-0.216444	-0.287134	-0.352014	0.124911	0.068493	-0.272679	-0.053184	0.319427	0.159608	0.328798	-0.0406851	0.167526	-0.0243886	0.267236	-0.2331	0.145825	-0.106283	0.0767594	0.185018	0.047217	0.220514	0.00883332	0.0640218	-0.125331	-0.0237135	0.136835	-0.0991823	0.0483703	0.135923	-0.0668415	-0.0749989	0.0526856	0.0634108	0.016445	-0.0507781	-0.0182834	0.0633225	0.0987716	0.0357722	-0.00185049	0.0493395	0.0750631	0.208477	0.0238978
MCZ41559	Nasalis larvatus	-0.0797671	0.394876	-0.425224	0.242677	0.116398	-0.156488	-0.413676	0.142522	-0.143993	-0.198172	0.209817	0.609728	0.260588	0.407713	0.218422	0.162858	0.0731465	0.286973	-0.361795	0.105567	-0.113609	0.261357	0.181304	-0.0293327	-0.0212473	-0.140479	0.0938415	0.061665	-0.0414838	0.170559	-0.10381	-0.0830984	0.127753	0.150992	-0.0408378	0.0900397	0.106209	0.0795525	0.0412077	-0.0112776	-0.0153226	0.123477	0.0430073	-0.0256348	-0.0945424	-0.132768	0.0676572	0.155281
MCZ41560	Nasalis larvatus	-0.243804	-0.295837	-0.643599	0.22063	0.196258	-0.0642231	0.10438	0.0605455	-0.18741	-0.257142	0.129009	0.460941	0.399537	0.297278	0.0746211	0.369394	-0.0563565	0.180258	0.0786609	0.336083	-0.133466	0.224505	-0.126015	0.109724	0.063732	-0.250301	-0.0233995	-0.0668223	-0.0610986	0.317242	-0.000164067	-0.101682	0.0077373	0.060854	-0.0415116	0.148935	-0.174345	-0.165321	-0.00876945	-0.0451795	0.235295	-0.007054	0.0638168	-0.0378239	0.0762222	0.18657	-0.0612454	-0.0360526
MCZ41562	Nasalis larvatus	-0.591714	0.0462931	-1.13998	0.255783	0.135212	-0.17118	-0.047655	0.333095	-0.108985	-0.287571	0.0382893	0.29272	-0.0806489	0.432748	0.16765	0.187934	0.0585976	0.235655	0.0927506	0.228995	0.00370495	0.303112	0.210373	0.0650176	-0.0901427	-0.15579	-0.123708	-0.31769	-0.22625	0.153767	0.0114997	-0.127304	0.0892731	0.0928237	0.0357446	0.192806	0.0745435	0.00876952	0.128802	-0.0776171	-0.0884275	0.0355833	0.245437	-0.124578	0.0449537	-0.0231196	-0.0360771	-0.103073
AMNHM52677	Papio anubis	1.12557	0.376671	-0.255184	0.106768	-0.144377	-0.0899287	0.182492	0.176433	-0.023024	-0.250432	0.343096	-0.466274	0.0417442	0.0330416	-0.3831	0.200822	-0.00176025	-0.0121618	0.126797	-0.189531	-0.063539	0.0402362	0.0554234	-0.209937	0.0652338	-0.078606	-0.0822304	-0.206382	-0.141518	-0.165448	-0.233198	0.306333	0.0567427	0.178004	-0.0240516	-0.0685875	0.0184947	0.147329	-0.0292449	0.0836778	-0.0962453	-0.105433	-0.148341	-0.175172	0.0975533	-0.0445762	0.0486636	0.130106
MCZ17342	Papio anubis	0.994383	0.311705	0.366182	0.0474403	-0.439298	0.34397	0.119347	-0.388876	0.263852	-0.135968	0.227708	-0.0908838	0.186929	0.0128054	-0.245461	0.0874951	-0.172952	0.310117	-0.0299854	0.242943	-0.327656	-0.00540008	0.138079	-0.0560663	-0.00885227	-0.183318	0.00414515	0.156862	0.130948	-0.137078	0.00986075	0.132579	-0.0830192	0.0182262	-0.203923	0.0577709	0.0208703	-0.0194504	-0.0445191	0.181862	-0.0117489	-0.0599882	-0.300375	-0.0935628	-0.0943586	0.279537	0.0985749	-0.271919
MCZ26473	Papio anubis	1.12682	0.342313	0.198562	-0.403694	-0.224772	-0.133644	0.334093	-0.278278	-0.0844166	-0.338875	0.184326	-0.161839	-0.107547	0.0844924	-0.162719	0.272106	-0.149202	0.319213	0.246732	-0.0550589	-0.196307	-0.0238381	0.117691	0.116539	-0.146194	-0.12057	0.0572971	-0.0812815	-0.076322	-0.146571	-0.082048	0.0548296	-0.148476	-0.0340197	0.00825924	0.103988	-0.083826	0.0836413	0.0997675	0.0578208	-0.0497401	-0.128439	-0.0389104	-0.288133	0.123445	-0.0221378	-0.0608449	-0.20342
MCZ31619	Papio anubis	1.79178	0.317545	-0.200044	-0.371716	-0.196318	-0.124781	0.0335366	-0.16671	-0.000110432	-0.228183	0.377397	-0.149715	0.110204	0.0259787	-0.663579	0.179471	0.182157	0.0959098	0.302001	-0.00813407	-0.0440579	-0.149381	0.102427	0.000680739	0.172188	-0.0137946	-0.0930676	0.204174	-0.0773715	0.0805272	-0.0429487	0.331141	-0.238832	-0.0846072	-0.0735331	-0.165805	0.032725	0.318339	-0.0924205	-0.0436615	0.254355	0.218836	-0.0718049	-0.0207413	-0.168362	-0.0694873	0.144515	0.0560101
MCZBOM8466	Papio anubis	0.507393	0.47808	-0.381642	-0.371077	-0.47115	-0.0547198	0.221832	0.126355	-0.0209644	-0.1164	0.147027	-0.180185	0.00431416	0.106125	-0.022083	-0.191291	-0.348525	0.204266	0.193417	-0.136775	0.077199	0.239665	0.0947126	-0.0571887	0.0120642	-0.0817622	0.159393	-0.162088	0.108232	-0.187486	0.0331862	-0.0997692	0.0335125	-0.0188343	0.170307	0.0407593	-0.142825	-0.195339	0.129634	-0.118254	-0.0161008	0.00577944	-0.0728533	0.138407	0.0633811	0.0796828	-0.130473	-0.076284
IPS9033	Pan paniscus	-1.1974	0.116229	0.441374	-0.224507	-0.995292	0.305296	-0.527662	0.40838	0.026233	-0.00339116	0.0218436	0.198523	-0.134161	0.155822	-0.404749	-0.232024	0.00802129	-0.425006	0.00538605	0.0883905	-0.119489	0.274372	-0.17409	-0.219494	0.189301	0.0575516	-0.170679	0.226274	-0.0122799	0.00453072	0.0459198	0.093131	0.0315661	-0.0891556	0.121771	0.197904	-0.0236522	0.15677	0.103559	-0.00515037	0.101653	0.109545	-0.0662666	0.107715	0.0319618	-0.14192	0.122994	-0.015501
MCZ38018	Pan paniscus	-0.506145	0.38368	0.606134	-0.917804	-0.290897	0.344145	0.0815546	0.584929	-0.293783	-0.235705	-0.0435066	-0.00877857	-0.457983	-0.131677	0.0638946	-0.32334	-0.178695	0.328113	0.0343137	-0.0988854	-0.00637647	-0.227999	-0.123871	-0.0432049	0.00101528	0.0830711	-0.0723074	0.0551262	0.246849	0.314474	-0.05069	0.118636	-0.0400357	-0.0882851	-0.127657	-0.177161	0.159724	-0.225352	0.00268537	0.0473369	0.0247196	-0.0267885	0.202713	-0.123211	-0.0521407	-0.0183532	0.193809	-0.0608614
MCZ38019	Pan paniscus	-0.780271	0.113078	0.624231	0.149442	-0.657861	0.345566	-0.433254	0.219572	-0.185509	-0.236603	0.305338	0.165022	-0.370316	-0.0603328	-0.346524	-0.275408	-0.109563	-0.344761	0.161648	0.0374435	-0.268567	0.181512	-0.112997	-0.122524	0.200658	0.0204029	-0.01642	-0.0579645	0.0504296	0.0692341	-0.129356	-0.320359	0.0342307	0.042108	0.0171182	0.0191016	0.162274	0.0852395	0.178633	-0.121879	-0.00225527	0.0814339	0.0776382	0.0597565	0.0230224	0.0261588	0.192672	-0.0604644
MCZ38020	Pan paniscus	-0.899808	0.167034	0.421784	0.102523	-0.429757	0.266446	-0.117893	0.458309	-0.0413301	-0.597706	0.0112585	0.0722938	-0.228321	-0.0532194	-0.220528	-0.21375	-0.204623	-0.30713	0.0763188	-0.137807	-0.432476	-0.247274	-0.0974399	-0.0271317	0.0847347	-0.0487175	0.0905397	-0.0793981	0.10644	-0.289881	-0.0421957	-0.138138	0.247717	-0.0279374	-0.191916	0.0900075	-0.217071	-0.10074	-0.158096	0.0962207	-0.056236	0.190288	-0.216343	-0.0321213	0.175389	-0.118423	0.159905	-0.0388671
AMNHM86857	Pan paniscus	-2.10065	0.354914	0.885234	0.115592	-0.707531	0.473962	-0.308317	0.0645124	-0.0108433	-0.267475	0.525699	0.319248	-0.190994	0.0295096	-0.274137	0.207081	-0.163455	-0.0413593	0.304126	-0.128373	-0.0755803	-0.00978284	-0.341944	0.0416108	0.161332	0.224316	-0.0602469	0.134313	-0.32398	-0.280667	-0.205551	-0.172839	0.14865	-0.0201407	-0.15369	0.208234	-0.0409627	0.0578133	0.104965	0.000645982	-0.0693561	0.0903476	0.172064	-0.132321	-0.189037	-0.0891784	-0.23253	0.175575
AMNHM167342	Pan troglodytes	-1.49063	0.223122	0.507711	0.0552663	-0.352688	0.961588	0.243679	0.347902	-0.0494464	0.0545616	-0.123972	0.0791924	0.0500132	0.397321	-0.252649	0.23951	0.437188	-0.119408	-0.101623	-0.267841	0.280839	-0.201213	0.220313	-0.202038	-0.0836429	0.0809042	0.0486133	-0.0689932	-0.270427	0.109756	-0.023152	0.0564848	-0.0680941	0.114886	0.0396796	-0.0851329	0.161931	-0.117642	0.0216672	0.1135	-0.0752191	0.0591764	0.0835472	0.134727	-0.0149572	0.0973644	-0.0792649	-0.093756
AMNHM167344	Pan troglodytes	-0.861529	0.314065	0.624046	-0.41692	-0.590227	0.766203	0.312221	0.182562	-0.175469	-0.413426	-0.0885425	0.220402	0.120353	0.158355	0.211625	0.140288	-0.135251	-0.0291426	0.121404	-0.114732	-0.0767784	-0.0625263	0.0148694	0.105786	0.167167	-0.268397	-0.0921129	-0.263028	0.0965777	-0.112126	0.0368232	0.0753001	-0.426635	0.140937	0.252785	-0.287645	-0.186386	-0.0939352	0.0181217	0.106556	-0.0351192	0.0458821	-0.00643144	0.0880625	-0.00780751	0.0261169	0.1333	0.16233
AMNHM51204	Pan troglodytes	-1.20787	0.516725	0.455458	0.141649	-0.223544	0.570457	0.00999531	0.154819	0.0787633	0.0472784	-0.18967	0.369086	0.165522	0.078359	-0.34689	0.171774	0.119423	-0.355769	-0.155322	-0.214481	0.0344953	0.0292375	0.263661	-0.0713389	-0.128951	-0.283419	0.040743	-0.0959591	-0.072289	-0.0033319	-0.325693	0.00865402	-0.15556	0.0313535	-0.0589157	-0.176552	-0.0041153	0.181167	-0.107864	0.0150662	0.0401818	-0.178688	0.201668	0.0123706	0.109363	0.166513	-0.137735	-0.013487
IPS5698	Pan troglodytes	-1.18674	-0.0556513	0.474404	-0.0731786	0.0266591	0.576119	0.236834	0.436614	0.154726	0.259445	-0.469645	0.163668	0.143164	0.296184	0.098667	0.166575	0.0257828	-0.146784	0.0479615	-0.015852	0.17445	-0.0730569	-0.0978076	0.0363392	-0.170509	-0.136297	0.100496	-0.02251	0.180012	0.118049	-0.20881	0.0629324	-0.198696	-0.0111705	-0.042949	0.0348697	0.0196968	0.00475965	0.0114615	-0.128045	-0.019446	-0.203208	0.0447114	-0.100742	0.027983	-0.141744	0.186289	0.104872
MCZ17702	Pan troglodytes	0.0452384	0.678488	1.11907	-0.384613	-0.764039	0.657872	-0.0408771	0.111214	-0.0111456	0.0153923	-0.0508676	0.103388	0.0524525	0.347996	0.00168209	-0.156934	0.106444	0.2703	-0.129338	0.0100888	0.468592	0.0870852	-0.241185	0.194727	-0.0507329	-0.0286804	0.2449	-0.0347553	0.0991348	0.150096	-0.00568536	0.225514	-0.0611534	-0.139005	-0.084456	-0.0596484	0.0121652	-0.0391896	-0.00343471	0.0322129	0.178357	-0.140331	-0.017877	0.128771	0.0190904	0.0224816	-0.0316375	-0.0558063
MCZ23167	Pan troglodytes	-0.811327	1.04046	0.9722	-0.119196	-0.754641	0.539374	-0.373804	0.124887	0.292946	-0.109429	-0.0839162	0.56432	-0.121582	0.0271351	0.334955	0.10245	0.0513345	0.0279642	0.0997898	-0.0506618	0.495319	0.00821683	-0.13301	-0.10514	0.0713339	0.109924	0.229296	0.0461794	-0.222174	-0.0139219	0.251456	-0.0442921	-0.180474	-0.091172	-0.0726387	0.125503	-0.147753	0.185678	-0.126475	-0.176695	-0.239169	-0.0318502	-0.171443	0.0227758	-0.121027	0.0409799	-0.155588	0.0931801
MCZ26847	Pan troglodytes	-0.855307	-0.174217	0.870074	-0.252498	-0.53887	0.739068	0.144458	0.617178	0.0826523	0.0780007	-0.670838	-0.0922947	-0.0531315	0.118836	0.13306	0.143708	0.0511066	0.16932	-0.0303048	-0.217351	0.112035	-0.134309	-0.0227123	0.0449905	-0.122434	-0.205537	-0.0111077	0.123859	0.220698	0.153583	0.118777	0.0136982	0.0636409	-0.00235275	-0.045745	0.225415	0.0629827	-0.0855135	-0.0391927	-0.140594	-0.0551142	-0.0123568	0.0106639	-0.14719	-0.0025196	-0.0869151	0.0231645	-0.062983
MCZ24080	Piliocolobus badius	1.34564	0.0525797	0.521952	-0.160668	-0.140213	-0.201035	0.200487	0.412118	-0.145258	0.215646	0.0791168	0.347668	0.197571	-0.312202	0.230551	0.00341188	-0.0524117	-0.0779747	-0.118041	0.136	-0.141189	0.0335413	0.0661576	0.259565	-0.117424	-0.120041	-0.102955	0.185506	0.156108	-0.0741784	0.0341216	-0.119488	-0.0442287	-0.061199	-0.017916	-0.111958	-0.010631	-0.036137	0.14327	-0.0868411	-0.00090194	0.0383223	-0.00382699	-0.0877836	-0.0944841	-0.0949261	0.0289413	-0.109877
MCZ24775	Piliocolobus badius	1.7809	-0.228024	0.177421	-0.247869	-0.196933	-0.190127	0.324504	0.0585336	-0.278159	0.0584156	-0.100858	0.399511	0.0630425	-0.376244	-0.196117	0.24784	-0.241108	-0.1134	-0.467649	-0.132191	-0.137473	-0.10408	0.170432	-0.0197333	0.278114	0.0262249	-0.22825	0.117123	-0.358375	0.0543167	-0.0782363	-0.118558	-0.0480789	0.132476	-0.0995059	-0.252896	0.0845774	-0.0538786	0.245574	-0.0100561	0.0180186	-0.0287693	-0.0667257	0.0972294	0.052609	0.128938	0.0388903	-0.00866123
MCZ24793	Piliocolobus badius	1.31251	-0.671816	0.821025	0.325239	0.0111226	-0.182796	0.193285	0.0472494	0.0144363	0.325039	0.143478	0.410982	0.522542	-0.334296	0.0287195	0.0760346	0.000855467	-0.237918	-0.391756	-0.00892699	-0.197657	-0.319415	0.108253	0.134292	-0.11775	-0.0628342	0.119895	0.122202	-0.134603	-0.123325	-0.0657028	-0.00165838	0.0798249	0.0836071	0.087643	-0.10928	-0.099195	0.0501919	0.0246632	-0.14078	0.0890116	0.216468	-0.0652048	-0.107872	0.0732408	0.042213	-0.017919	0.0285906
MCZ25627	Piliocolobus badius	1.35929	-0.175168	0.269278	-0.286149	-0.450085	-0.26153	0.180155	0.287945	-0.141335	0.0853609	0.20674	0.0582787	-0.0444138	-0.29225	0.227491	-0.272185	0.0358235	-0.220081	-0.388601	-0.0742741	0.0110305	0.116755	-0.0640543	-0.000602117	-0.186894	0.0502509	-0.146383	-0.0414321	-0.12987	-0.00354114	0.136599	0.134461	-0.0321478	0.0931016	-0.0485804	-0.135474	0.132024	-0.177039	0.157855	-0.143114	-0.0907762	0.0908598	-0.194442	0.104208	0.082793	-0.164135	-0.11233	-0.111185
MCZ25631	Piliocolobus badius	1.49155	0.299233	0.230056	-0.122686	0.147973	-0.106188	0.198917	0.448571	-0.074129	-0.0896198	-0.0286096	0.278736	-0.021114	-0.14635	0.390756	0.0760154	-0.0716656	-0.013534	-0.173125	0.152972	0.150957	-0.0437403	-0.0296392	0.371086	-0.081218	-0.0195725	-0.323959	0.285041	-0.13588	-0.0606542	0.0350846	0.0117382	-0.171062	0.0936037	0.0674307	-0.0518359	0.0767648	0.230078	0.11912	0.0123432	0.120061	0.0881348	-0.0567685	0.0403456	0.214171	-0.0221402	-0.141754	0.0873111
IPS10647	Pongo pygmaeus	-3.37068	-0.0889843	0.307155	-0.255136	0.455384	-0.604795	0.838178	0.665614	0.049641	-0.130441	-0.0873621	-0.372198	-0.17514	0.0874369	-0.180773	-0.022294	0.00507188	0.076243	-0.198683	0.0718245	0.00742643	0.372904	-0.00833897	0.664754	-0.139896	0.191507	0.040566	0.360317	-0.0754959	0.0996851	-0.0974238	-0.0527387	0.119118	0.326181	-0.394252	-0.0775625	-0.139554	-0.0239425	-0.0781965	0.267785	-0.189098	0.0427132	-0.103505	-0.0551131	-0.123633	0.189993	-0.0991308	0.202934
IPS10651	Pongo pygmaeus	-2.60604	-0.371969	0.589091	0.131028	0.406459	-1.20319	0.549706	0.439434	0.108843	-0.0683604	-0.0802055	0.17144	0.276961	-0.256322	-0.214755	-0.42171	0.101194	0.321612	-0.21696	-0.134329	-0.533684	-0.0656001	-0.221337	-0.0285819	0.405641	0.00533778	0.244586	-0.0382173	0.0526619	0.0574476	0.0983053	-0.0594269	0.0623408	-0.401945	0.197218	-0.0791368	0.152845	0.359641	0.172779	0.0429611	0.0745137	-0.164632	0.06765	0.0984481	0.0545654	-0.0284803	-0.0907849	0.176491
IPS9031	Pongo pygmaeus	-2.41805	0.359612	1.79852	-0.0612987	-0.190223	-0.980134	0.550738	-1.01004	1.0757	0.372114	1.12859	-0.175106	-0.431072	0.0374912	0.367196	0.950182	-0.00735946	-0.233619	-0.126855	-0.226421	0.101105	0.273431	-0.0915321	-0.141185	0.0482105	-0.205963	-0.314079	-0.0373669	0.0974219	0.152811	0.232572	-0.0481118	0.129752	-0.0524078	-0.111156	-0.0657257	0.0438398	-0.0368447	-0.00274625	-0.0222049	0.0845688	-0.0449217	0.082215	0.0782996	0.149716	-0.115547	0.0816491	-0.0198322
IPSSN	Pongo pygmaeus	-2.18366	0.357303	0.231144	-0.107925	0.136164	-0.711817	1.0856	0.175443	0.00116251	-0.226383	-0.570149	0.00412872	-0.134662	0.176232	-0.233712	-0.18327	0.324226	-0.0104902	-0.212876	-0.119035	0.110968	0.107085	0.319777	0.167931	-0.210787	-0.0106	0.0408472	-0.225048	-0.0440076	-0.248031	0.313309	-0.0512457	0.100625	-0.240504	0.0985503	0.109354	-0.157718	0.245344	0.0509847	0.00381906	0.0524894	0.0671358	0.122566	0.0159591	0.113075	0.221328	0.212026	-0.0749124
MHNTZOO201108	Pongo pygmaeus	-2.92279	-0.321075	0.811511	0.455463	0.159123	-0.785526	0.593323	0.395176	0.192434	0.0469245	0.349527	-0.234833	0.410518	0.243362	-0.16659	-0.219817	0.0789913	0.0305744	-0.181773	-0.0803358	-0.164176	0.176836	-0.109446	0.0851816	0.355438	0.195248	0.162796	-0.0947421	0.0988853	-0.0651342	0.19176	0.296144	-0.142484	0.199352	0.337421	0.076191	0.133237	-0.123074	-0.224498	0.0733193	0.0720841	-0.130033	-0.0318791	-0.0530831	-0.1965	-0.0364294	-0.0861405	-0.222266
SENCK1576UU	Pongo pygmaeus	-2.4941	0.177926	0.57035	0.344263	0.134343	-0.670245	0.91247	-0.268816	0.492191	-0.206474	0.152672	0.0908402	0.75037	0.125887	0.401211	-1.04843	-0.376488	0.0435331	0.514807	0.111651	0.473841	-0.472328	0.468073	-0.349831	0.144389	-0.0364543	-0.511308	-0.0992198	-0.101233	0.281361	-0.272327	-0.183523	-0.0484992	0.113243	-0.140502	0.0719188	0.0524918	-0.00580787	0.0334761	-0.0546813	0.0159435	0.0421329	-0.176203	-0.105591	-0.0385549	-0.040188	0.0433483	0.0270262
MCZ35621	Presbytis hosei	1.20812	0.268192	0.225868	-0.281593	-0.291918	-0.105563	0.134593	-0.0627103	0.121167	0.0231547	-0.148485	0.263049	-0.21728	-0.470676	0.00752012	-0.0599962	-0.0091972	-0.018817	0.00274634	-0.290795	-0.180114	-0.0579118	-0.0348346	-0.0841192	0.0100947	-0.0787004	0.041948	-0.105301	-0.159248	0.264584	0.0556297	0.0428561	0.227466	-0.0867092	0.00761454	-0.162494	-0.0380598	-0.270622	-0.0518947	-0.0430042	0.132474	0.098144	-0.105848	-0.296484	-0.120707	0.0107349	-0.254333	0.0432613
MCZ37370	Presbytis hosei	0.399465	-0.251042	0.209004	0.188068	-0.039427	0.1251	-0.0774973	-0.265456	0.106083	-0.0203309	-0.215178	0.112494	-0.0150148	-0.444975	0.0139609	0.0445866	0.200107	-0.150031	0.249218	-0.168399	-0.196175	0.23165	0.170016	0.153642	0.0640364	-0.0627294	0.129285	-0.0984863	-0.0119619	0.094406	-0.00244733	-0.277919	-0.101839	0.00667642	0.0929044	-0.0501501	0.120771	-0.0440562	-0.166053	0.0360283	-0.0543526	-0.0342571	-0.0581802	-0.148323	-0.0712647	-0.0186978	0.0317903	-0.0490105
MCZ37371	Presbytis hosei	1.05436	-0.122014	0.181978	-0.00500644	0.0998774	-0.0155386	0.130917	-0.230835	-0.0294501	-0.13534	-0.431627	0.0971677	-0.0708331	-0.321694	-0.0803473	0.0626095	0.0397067	-0.0203439	0.0539737	-0.14546	-0.045563	-0.017685	0.241825	0.118379	0.0538414	-0.0914262	-0.0920177	-0.188382	-0.193445	0.0937985	0.193492	-0.200393	0.0599534	-0.0724249	0.0155208	-0.00548026	0.159368	-0.0671899	-0.0305162	-0.0365934	-0.195558	-0.0918668	0.0515724	-0.0939914	-0.124582	-0.0547492	0.0373093	-0.0911545
MCZ37372	Presbytis hosei	1.51146	0.370267	0.727821	-0.251429	0.251095	0.340006	0.271902	0.120993	0.315423	-0.161012	-0.343771	0.179224	0.0714533	-0.508628	-0.0528617	0.192673	-0.273728	0.223461	0.295892	-0.11196	-0.0382044	0.01894	0.194477	-0.0378652	-0.188044	0.00112248	0.083425	-0.0301352	-0.191111	-0.0265778	0.223764	-0.0941575	0.224194	0.106795	0.305511	0.106653	0.0766341	-0.00166036	-0.21084	0.0598456	0.00612767	-0.00991368	0.0221469	0.0286193	-0.0567365	-0.0514271	-0.0780738	0.0888603
MCZ37772	Presbytis hosei	0.613842	-0.395908	0.350041	0.440127	0.14961	0.31944	-0.0397075	-0.153135	0.145548	-0.0968836	-0.169886	0.0139662	0.370354	-0.486897	0.00445531	0.160864	0.120017	-0.187552	0.0631958	-0.192592	-0.113711	-0.0551064	0.0704968	0.095922	-0.0204243	0.0921768	0.0293408	-0.113437	-0.111463	0.106066	0.0492293	0.0273798	0.0745058	-0.0494969	0.137637	0.0367717	-0.0244734	0.0498414	-0.0873741	-0.012056	-0.173539	0.110238	-0.00384988	0.0820397	0.0232641	0.0867622	0.176488	-0.00605992
MCZ22276	Presbytis rubicunda	2.21739	0.40604	0.226143	-0.342652	-0.0402413	-0.32777	-0.0272662	0.224269	0.419509	-0.132045	-0.0895474	0.290566	-0.243227	-0.112006	-0.0182851	0.135375	0.0727475	0.0181006	0.238526	0.0397935	0.0856968	0.188096	0.195982	-0.022159	0.0910079	0.359757	-0.041772	0.0281066	0.0744697	0.0688641	-0.103154	0.0822622	0.0390449	0.0706022	0.0972782	0.149882	0.192161	0.0981695	-0.12326	-0.0324547	0.0896412	0.0232894	-0.0306692	0.0424129	-0.107176	0.168305	-0.0507264	-0.0807018
MCZ35704	Presbytis rubicunda	1.28402	0.374147	0.064342	-0.166827	0.137163	-0.218469	0.0418438	0.255622	0.171082	0.0236871	-0.29989	0.217719	-0.137288	-0.041345	0.443357	0.0563583	0.0210828	-0.0431883	0.166413	0.0597744	-0.0502659	-0.0277985	0.0192696	-0.106518	0.0591199	0.24519	-0.145566	-0.116487	0.15419	-0.161271	-0.0551233	0.125354	0.0751972	0.0436603	-0.0809589	-0.0731402	-0.0497636	0.0542309	0.0631719	0.143766	-0.0248107	-0.0940133	0.0119066	0.00628126	0.154925	0.00661432	-0.109515	0.0466141
MCZ35705	Presbytis rubicunda	1.30162	0.306468	-0.047174	-0.0272527	0.116711	-0.267461	0.229703	0.0397871	0.274275	0.0188834	-0.161141	0.323015	-0.180908	0.0628905	0.269984	0.0584751	0.249731	-0.127449	0.13201	0.184549	-0.0588416	-0.0824581	-0.0822645	-0.0410791	0.104436	0.41838	-0.0389412	-0.119152	0.175415	-0.0659765	-0.0777978	0.127892	0.170323	0.089765	-0.0175651	-0.0129053	-0.0549088	-0.12327	0.0494452	-0.0565474	0.0013492	0.0196199	-0.0226646	-0.008158	0.0247406	0.107258	0.0905833	0.0655585
MCZ35706	Presbytis rubicunda	0.914443	0.238987	-0.219988	0.0356673	0.0688877	-0.0504865	0.394267	0.135586	0.346396	0.0399006	-0.138354	0.30776	-0.280207	0.139135	0.268491	0.0907101	0.308613	-0.213835	0.0187121	0.277121	-0.0817615	-0.0334572	0.0605622	-0.276131	0.081561	0.519699	0.0428537	-0.148742	0.123865	-0.189586	-0.0603127	0.0792618	0.0684546	0.0849628	-0.0732934	-0.152406	-0.0886943	-0.091976	-0.00340751	0.0628735	0.00716045	-0.0882297	0.00511802	0.018295	-0.0745491	0.0477097	0.0621096	-0.0342368
MCZ35712	Presbytis rubicunda	0.964091	0.193036	-0.0465207	-0.129544	0.147503	-0.292261	0.251208	0.225595	0.303098	0.0985054	-0.203172	0.38262	-0.0956985	-0.119807	0.18364	0.0874342	0.244212	-0.213027	0.353827	0.121134	-0.0724095	0.139829	-0.048356	-0.11595	0.0320996	0.396165	-0.0634047	-0.136232	0.117985	-0.0990422	-0.187462	-0.00127464	0.122781	0.137607	0.189763	0.00236119	-0.0608285	-0.0231264	-0.0174087	0.086693	0.0375231	-0.07906	0.0505878	0.0617907	0.0612239	0.0018011	0.0536885	0.0830752
AMNHM102724	Symphalangus syndactylus	-0.0702959	-0.734412	0.295413	-0.179059	0.723127	-0.160774	-0.44498	0.216861	0.0457307	0.301722	0.254099	-0.144829	-0.196529	0.087494	0.166234	-0.0237505	-0.302189	-0.419605	-0.243054	0.023031	0.0483848	0.0222929	0.279558	-0.125307	-0.232333	-0.000504921	0.175818	-0.0995753	-0.0747869	0.0281164	-0.121685	0.0988039	-0.357606	-0.380028	-0.0313215	0.0773573	-0.103752	-0.122856	0.0897844	0.050171	0.0423595	0.108602	0.0206327	-0.0401983	-0.0527977	0.124987	-0.0194424	0.0788743
AMNHM106583	Symphalangus syndactylus	0.249962	0.411014	0.523474	0.0136228	0.902021	-0.127845	-0.389594	0.039959	0.342793	0.0258821	-0.00986362	0.00847063	-0.033871	0.0475212	0.0553407	-0.0760298	-0.0368983	-0.440783	-0.025297	0.117701	-0.0176545	0.280475	0.0584152	-0.184186	-0.246261	-0.0236596	0.188309	0.0448195	0.00215191	0.1901	-0.267458	-0.097954	0.000262267	-0.316579	0.0993133	0.0563098	-0.137068	0.0485564	-0.0673744	0.153358	-0.0989263	0.0603233	0.0211796	-0.120574	0.116301	0.0709657	-0.109077	-0.142234
MCZ36031	Symphalangus syndactylus	0.74196	-0.215216	0.516168	-0.327706	0.518612	-0.431249	-0.799199	0.484424	-0.0437335	0.430585	0.330329	0.0909937	0.0396135	0.0905618	0.226638	-0.182722	-0.629624	-0.189606	0.0579897	0.194167	0.169618	0.282752	-0.0764629	0.277648	-0.0331078	-0.040333	0.284448	0.011466	-0.121002	0.0762213	-0.0878662	-0.0722129	-0.0725574	-0.0916232	0.137569	-0.156665	-0.124495	-0.028108	-0.321862	0.0770973	-0.0385347	-0.130724	-0.145676	0.00644807	0.141243	-0.150435	0.121984	-0.0448265
MCZ36032	Symphalangus syndactylus	1.41993	0.285225	-0.0123343	-0.69938	0.377451	-0.324625	-0.590137	0.498931	0.279866	-0.0352476	-0.0432917	0.00108677	-0.221264	0.395882	0.215557	-0.0474635	-0.220873	0.213215	-0.136039	0.175102	-0.00539123	-0.0437224	0.211335	-0.114492	0.0496919	0.057405	-0.211353	0.111607	-0.068326	-0.0589866	0.178733	-0.100006	0.117943	-0.373084	-0.130271	-0.0161558	-0.105927	0.11015	0.0182548	0.109858	-0.137264	0.0347183	-0.0671017	0.191499	-0.245062	0.128419	-0.0887888	-0.142363
AMNHM19549	Theropithecus gelada	-0.0758677	-0.0175189	-0.344775	-0.504904	0.0823261	0.0860908	0.120888	0.00372662	-0.486215	0.22393	0.509718	-0.059782	0.249654	0.133298	-0.0760985	0.0697186	0.279593	-0.338653	0.197228	0.0624242	0.0596445	-0.260404	0.0149134	-0.105236	-0.0505277	0.0525219	0.042179	0.0684103	-0.018989	0.13397	0.0695726	-0.0420006	-0.0501685	-0.101803	0.128396	0.106588	-0.0303274	-0.0333961	-0.0147619	0.129209	0.102172	0.0381096	0.0472793	-0.00803278	-0.00362585	0.0573966	0.0240801	-0.00586697
AMNHM238034	Theropithecus gelada	0.972356	-0.411645	-0.170276	-1.08251	-0.0281988	-0.340325	0.182416	0.390034	-0.700305	0.138302	0.477837	-0.136799	0.05296	0.123257	0.17032	0.0696404	0.174761	-0.0528302	0.143452	-0.0910911	-0.0398348	-0.196172	-0.0139867	-0.0301632	-0.0339678	0.0154829	-0.0543101	0.199249	-0.013457	-0.00561311	0.12655	-0.153069	0.016152	0.0669445	0.186014	0.078603	-0.0106723	0.0985615	-0.0316083	0.0322675	-0.00381648	-0.000711541	0.115713	-0.036812	0.0212874	0.149717	0.0207364	-0.0515125
AMNHM60568	Theropithecus gelada	0.20968	-0.728627	-0.138409	-0.590703	-0.0624351	0.0290154	0.206399	0.123893	-0.479729	0.2731	0.436249	-0.0254808	0.387611	0.165281	-0.0240831	0.108799	0.234426	-0.0524289	0.137333	-0.0382043	-0.0496335	-0.234013	0.0678913	-0.242884	-0.139356	0.0826127	0.025009	0.173155	0.120814	-0.0526787	0.137568	-0.157714	0.124902	0.0929868	-0.0410291	0.0358846	-0.0619343	0.0539187	-0.120061	-0.0427256	-0.0872772	-0.0452678	0.050633	-0.00612947	-0.00348117	0.00230333	0.052197	-0.0198566
AMNHM80126	Theropithecus gelada	0.439654	-0.850409	-0.464302	-0.842488	-0.19982	-0.238189	0.201532	0.360697	-0.444224	0.283053	0.37524	-0.178712	0.131303	0.198148	0.119371	0.0765603	0.0916489	-0.0544673	0.203475	-0.0124361	0.0663493	-0.0967808	-0.140826	-0.230738	-0.0175149	-0.00709883	0.00772438	0.141787	0.0987551	-0.12128	0.083964	-0.287618	0.0268489	0.119032	0.0515685	0.0513848	-0.0126592	0.0962903	-0.115716	-0.00893662	-0.0680147	-0.0913353	0.0370302	-0.0315588	-0.0307842	0.0516408	-0.00979878	-0.0508485
AMNHM90309	Theropithecus gelada	0.366593	-0.596471	-0.170098	-0.529156	-0.259654	-0.0330084	0.249284	0.193645	-0.33362	0.4728	0.349121	0.165646	0.45243	0.24441	0.00909161	0.114033	0.234012	-0.203842	0.128972	0.0601462	-0.0332229	-0.184813	0.0296003	-0.151032	-0.0699095	-0.0175544	0.118768	0.0421154	0.110736	-0.100894	0.14257	-0.0967321	0.0592056	-0.021428	-0.0590615	-0.0106869	-0.126172	0.00558282	-0.0360999	0.0250485	-0.0357015	-0.0524092	-0.103244	-0.0740761	0.0958832	-0.0645945	-0.0242656	0.0276695
MCZ35567	Trachypithecus cristatus	0.2064	0.596429	-0.474299	0.164108	0.545556	-0.17591	0.0852376	0.269765	-0.00688569	-0.50228	0.134195	-0.295334	-0.0792141	-0.306033	0.340383	-0.00160724	0.37543	-0.0349558	-0.030579	-0.236628	0.234149	0.0405881	-0.084131	-0.243077	0.10992	-0.108683	0.349592	0.185466	-0.0136534	-0.00693739	-0.061897	0.0705545	-0.0158858	0.0220731	-0.160421	0.0812359	0.0667323	-0.130081	0.0634172	-0.00185452	0.015729	-0.116064	0.0309618	0.0504398	0.084255	-0.0441394	0.0758833	-0.0730748
MCZ35584	Trachypithecus cristatus	0.0277774	0.101856	-0.482974	0.0864627	0.469231	-0.0752019	0.375483	0.123646	-0.16915	-0.480274	0.0507857	-0.167358	-0.330847	-0.186997	0.268113	0.107284	0.172439	-0.141635	0.0715738	-0.203989	0.0349173	0.0200793	0.0805653	-0.130416	0.0948403	-0.12728	0.16985	0.165625	-0.0269383	0.129682	-0.040847	-0.0524269	-0.0550882	0.0657766	0.0182082	-0.0255938	-0.086777	0.0587425	0.0405348	0.050016	-0.0445075	0.0253032	-0.0798109	-0.190981	-0.115199	-0.0982409	0.0533104	0.0414287
MCZ35586	Trachypithecus cristatus	0.134126	0.582017	-0.270428	0.493161	0.388695	0.279831	-0.0975515	0.0152703	-0.119766	-0.323372	0.039398	-0.196658	0.162224	-0.40953	0.242051	0.0463079	0.0503429	-0.12979	-0.1864	-0.187685	0.283982	-0.104416	-0.0778496	0.0533913	0.162388	-0.140774	0.213701	0.123149	0.123229	0.019797	0.0568635	-0.0477576	0.219207	-0.0315933	-0.0969599	-0.0300654	-0.0008462	0.0137112	0.0569375	0.00173569	-0.0828404	0.0633116	-0.00407232	0.0768518	-0.000549778	-0.0748023	0.105044	-0.0683831
MCZ35597	Trachypithecus cristatus	0.621407	0.970892	-0.439136	0.146276	0.420336	0.163562	-0.0552854	0.191186	0.257138	-0.521767	0.153806	-0.307508	-0.0177537	-0.211935	0.280241	0.106204	0.317498	0.0354421	-0.178127	-0.0902878	0.152212	-0.101481	-0.00602323	-0.200778	0.26843	-0.163487	0.233583	0.228798	0.0285964	0.0242082	-0.104836	-0.0826791	-0.0176363	0.0958393	-0.0725463	0.0394713	-0.129341	0.10048	0.135997	0.105614	-5.63e-05	0.00903794	0.0187167	0.0483825	0.0453743	0.060676	-0.00322552	-0.0146128
MCZ35603	Trachypithecus cristatus	0.214848	0.778507	-0.580294	0.0902943	0.45936	-0.0100238	0.042123	0.145837	-0.00528956	-0.451979	0.0233869	-0.246632	-0.0786623	-0.286773	0.245031	-0.0250514	0.138141	-0.153483	0.135501	-0.159086	0.172762	0.143519	0.0607938	-0.0864643	0.175967	-0.149861	0.212219	0.155264	-0.0947314	0.030084	-0.0323585	0.133402	0.0395875	0.0382848	-0.0242002	0.0116318	0.0245488	0.0663827	0.0657735	-0.0727284	0.01498	0.0890384	-0.0635115	0.0997408	0.0459104	-0.0559925	0.0852085	-0.0550168
BAC208	Oreopithecus bambolii	-1.05422	-0.599879	-0.435573	-0.00226235	0.0528148	-0.252605	0.473153	0.259813	0.251341	-0.125345	-0.144396	0.255456	0.650353	-0.189375	-0.304273	0.0880877	-0.0333916	-0.385444	0.494046	-0.0612184	0.145969	0.396327	-0.0484192	-0.185704	-0.0823974	-0.212737	0.331425	-0.0582705	0.0475116	-0.121137	0.114257	-0.110506	0.263299	-0.121205	0.103842	-0.1891	-0.13908	0.117666	-0.0698488	-0.354029	-0.0494775	0.197415	-0.0783937	-0.0520186	-0.159655	0.0205042	0.121621	-0.0195019
StW573	Australopithecus sp.	-1.65777	0.179004	-0.257135	-0.214411	-0.0518488	0.595939	-0.203829	-0.161778	0.211408	-0.0294798	-0.276128	0.0476617	0.340694	-0.053291	0.186195	0.349678	0.269791	-0.165896	-0.204433	-0.196072	-0.0182986	0.0109758	-0.138453	-0.0277748	-0.131774	-0.0967728	-0.0990769	0.363719	0.00608739	-0.359963	-0.139838	-0.144735	0.0700062	-0.138853	-0.0226982	0.0514212	0.0586017	-0.0659636	0.124358	0.0731278	0.31805	0.113438	0.0682253	0.244206	-0.0194156	0.165637	0.0217793	-0.20162
StW570	Australopithecus sp.	-2.38584	-0.679957	-0.209966	-0.712713	0.133051	0.212986	0.0799709	-0.287903	0.24055	-0.306056	-0.581008	-0.126256	-0.0319775	-0.138471	-0.100734	0.0583064	-0.213221	-0.0129065	0.110289	-0.0204855	-0.00155698	0.135323	0.0387127	0.0885114	-0.149035	-0.259308	-0.019438	0.314214	0.0694473	-0.0837864	-0.0751411	-0.122184	0.246829	0.0437233	-0.108313	0.0927119	0.0240856	-0.216486	-0.118905	0.0185941	-0.0512157	-0.0229091	0.0256627	-0.0137681	0.05738	-0.0160302	0.0690634	-0.153052
[truncated: 93 more columns]
