# Supplementary material for: The evolution of the vestibular apparatus in apes and humans
Source: eLife. 2020 Mar 3;9:e51261. doi: 10.7554/eLife.51261 (PMC7054002; doi:10.7554/eLife.51261)
Supplement: Figure 9—source data 1. — The variance explained by each bgPC is reported within parentheses. Table provided as a separate Excel file. [file elife-51261-fig9-data1.xlsx]

## Sheet: LM_bgpcscores_all_ind
ID	Species	bgPC1 (53.34%)	bgPC2 (29.29%)	bgPC3 (17.37%)
DUEALP02	Alouatta palliata	-0.999676	-2.88901	0.65609
DUEALP04	Alouatta palliata	-1.37189	-3.25608	0.277849
DUEALP06	Alouatta palliata	-1.21796	-3.22047	1.13814
DUEALP10	Alouatta palliata	-1.14519	-2.63912	0.948497
DUEALP12	Alouatta palliata	-0.645201	-3.40539	1.34415
MCZ10138	Ateles geoffroyi	0.412326	-6.21059	2.65388
MCZ29626	Ateles geoffroyi	0.821994	-4.74243	1.69176
MCZ29628	Ateles geoffroyi	0.417168	-4.86325	0.507827
MCZ29658	Ateles geoffroyi	0.557079	-4.32699	1.94769
MCZBOM5351	Ateles geoffroyi	1.60925	-5.03555	1.46428
MCZ27891	Cebus apella	-0.266936	-2.19715	0.542734
MCZ31063	Cebus apella	-0.744552	-0.863138	-1.68865
MCZ37833	Cebus apella	0.212712	-1.88255	0.588338
MCZ41090	Cebus apella	0.727843	-1.95619	-0.0511918
MCZ49635	Cebus apella	1.81484	-0.75198	0.119573
AMNHM52634	Cercocebus galeritus	0.997539	0.701128	0.25074
AMNHM52635	Cercocebus galeritus	1.63845	0.339521	0.115747
AMNHM52640	Cercocebus galeritus	1.7724	0.405272	1.12623
AMNHM52641	Cercocebus galeritus	2.30826	0.813755	0.94567
AMNHM52645	Cercocebus galeritus	1.32205	1.11322	0.874781
MCZ22734	Cercopithecus mitis	0.248099	0.954214	0.29646
MCZ25022	Cercopithecus mitis	1.45211	-0.00840756	1.81636
MCZ26832	Cercopithecus mitis	1.2078	0.57361	2.11292
MCZ39389	Cercopithecus mitis	1.7342	0.446612	0.625839
MCZ44264	Cercopithecus mitis	2.31344	0.475551	-0.230238
SIU4792	Chlorocebus pygerythrus	-0.0313336	-0.105701	-0.252041
SIU4793	Chlorocebus pygerythrus	0.899031	1.10747	0.0697606
SIU4794	Chlorocebus pygerythrus	1.93993	1.09695	0.00169936
SIU4795	Chlorocebus pygerythrus	0.862405	-0.0146848	0.629585
SIU4796	Chlorocebus pygerythrus	1.83802	-0.011256	-0.719774
AMNHM52211	Colobus guereza	3.64903	0.223409	0.583833
AMNHM52213	Colobus guereza	3.23456	-0.12948	-0.0873143
AMNHM52225	Colobus guereza	2.22597	-0.72873	0.531108
AMNHM52237	Colobus guereza	3.12871	-1.26795	1.21379
AMNHM52249	Colobus guereza	4.00577	-0.397067	0.411588
MCZ37280	Erythrocebus patas	0.0404503	1.8383	-0.418943
MCZ47015	Erythrocebus patas	0.859289	1.76583	-0.0767263
MCZ47016	Erythrocebus patas	0.380623	2.17265	-0.0268738
MCZ47017	Erythrocebus patas	0.500413	0.763435	0.200596
MCZ47018	Erythrocebus patas	0.144659	1.9527	-0.866198
AMNHA999686	Gorilla gorilla	-0.28867	2.5941	0.558275
AMNHA999687	Gorilla gorilla	-2.07701	2.13794	-0.114251
AMNHM167338	Gorilla gorilla	-1.766	2.30541	0.354413
AMNHM54356	Gorilla gorilla	-2.82022	1.92993	-0.385398
MCZ17684	Gorilla gorilla	1.15754	3.10899	0.685018
MCZ26850	Gorilla gorilla	-2.67904	2.8961	0.519634
MCZ37264	Gorilla gorilla	-1.75533	3.56275	-0.457146
AMNHM112673	Hoolock hoolock	-1.46525	-0.918502	-2.57901
AMNHM112720	Hoolock hoolock	-0.517167	0.37043	-2.98555
AMNHM112983	Hoolock hoolock	-0.0360082	-1.29406	-1.73188
AMNHM201742	Hoolock hoolock	-0.45962	-0.642532	-2.03161
AMNHM83421	Hoolock hoolock	0.479833	-0.383189	-2.05359
AMNHM83425	Hoolock hoolock	0.132939	-2.03769	-2.14868
EMBR121	Homo sapiens	-1.55794	0.463576	0.827522
EMBR179	Homo sapiens	-1.66386	-1.5116	1.76213
EMBR212	Homo sapiens	-4.56101	-1.13916	0.60696
EMBR215	Homo sapiens	-2.51933	-2.16477	3.02603
EMBR281	Homo sapiens	-2.29012	-0.650601	1.62387
MCZ41411	Hylobates lar	-2.53554	-0.602842	-3.4353
MCZ41412	Hylobates lar	-1.85949	-1.34932	-3.24267
MCZ41416	Hylobates lar	-1.16936	0.124853	-2.54984
MCZ41418	Hylobates lar	-0.991208	-0.291464	-3.00486
MCZ41421	Hylobates lar	-2.14562	-0.332219	-3.95627
MCZ41424	Hylobates lar	-1.88171	-0.650222	-3.39163
MCZ41452	Hylobates lar	-2.21482	0.521874	-2.15205
AMNHM52596	Lophocebus albigena	1.62878	-0.110087	0.804805
AMNHM52603	Lophocebus albigena	2.10911	0.152287	0.449755
AMNHM52606	Lophocebus albigena	1.80303	-0.0660974	0.379462
AMNHM52607	Lophocebus albigena	1.61702	-0.475462	1.20886
AMNHM52615	Lophocebus albigena	2.46724	-0.364653	0.749684
MCZ12758	Macaca fascicularis	0.707623	1.06732	0.548292
MCZ22277	Macaca fascicularis	1.4923	-0.171603	-0.344709
MCZ23812	Macaca fascicularis	0.335865	0.861233	0.761653
MCZ23813	Macaca fascicularis	1.46534	1.4274	-0.44632
MCZ35765	Macaca fascicularis	1.6897	0.585609	0.217624
AMNHA9912049	Mandrillus sphinx	1.89804	-0.63874	0.565738
AMNHA9912056	Mandrillus sphinx	0.79265	2.12792	-0.846186
AMNHM89362	Mandrillus sphinx	0.205355	0.942822	-1.07548
AMNHM89364	Mandrillus sphinx	1.18526	2.43202	-0.589923
AMNHM89365	Mandrillus sphinx	1.10443	-0.0892246	0.0945905
MCZ19976	Miopithecus talapoin	-0.0837209	-0.114708	-0.462887
MCZ23196	Miopithecus talapoin	0.539993	-0.397606	0.316341
MCZ23197	Miopithecus talapoin	0.654373	0.0189367	0.270848
MCZ34264	Miopithecus talapoin	0.340529	-0.0384503	-0.305045
MCZ37278	Miopithecus talapoin	1.81668	0.435795	-0.117953
MCZ37342	Nasalis larvatus	1.00805	0.930005	-0.705652
MCZ41555	Nasalis larvatus	1.09089	1.68677	0.509969
MCZ41559	Nasalis larvatus	-0.0676998	1.07828	-0.377545
MCZ41560	Nasalis larvatus	1.22837	0.129457	0.468207
MCZ41562	Nasalis larvatus	1.41939	0.585233	0.427203
AMNHM52677	Papio anubis	2.55498	1.26963	-0.607761
MCZ17342	Papio anubis	0.813258	0.74162	0.353771
MCZ26473	Papio anubis	1.10313	1.00594	-0.703779
MCZ31619	Papio anubis	3.25021	1.36399	-0.173631
MCZBOM8466	Papio anubis	0.998101	1.81941	1.06704
IPS9033	Pan paniscus	-2.91276	1.01707	0.346558
MCZ38018	Pan paniscus	-1.62077	-0.194185	0.838379
MCZ38019	Pan paniscus	-1.70941	0.45581	0.856246
MCZ38020	Pan paniscus	-3.43815	0.894653	0.736459
AMNHM86857	Pan paniscus	-2.58936	-0.0128772	2.3088
AMNHM167342	Pan troglodytes	-2.88433	0.787009	1.18139
AMNHM167344	Pan troglodytes	-2.67367	1.15956	1.44048
AMNHM51204	Pan troglodytes	-2.03462	0.955644	0.267733
IPS5698	Pan troglodytes	-2.96757	-0.652455	0.419298
MCZ17702	Pan troglodytes	-3.45796	1.15362	1.05901
MCZ23167	Pan troglodytes	-2.842	2.30067	0.759334
MCZ26847	Pan troglodytes	-3.12364	-0.569668	1.55728
MCZ24080	Piliocolobus badius	-0.223291	-0.48892	0.457139
MCZ24775	Piliocolobus badius	2.31487	-0.793432	0.208232
MCZ24793	Piliocolobus badius	-0.027856	-2.28916	0.272625
MCZ25627	Piliocolobus badius	0.882804	-0.505739	1.2485
MCZ25631	Piliocolobus badius	0.377807	0.595346	-0.471452
IPS10647	Pongo pygmaeus	-4.12381	0.158272	0.363405
IPS10651	Pongo pygmaeus	-4.13931	-0.931598	0.0438824
IPS9031	Pongo pygmaeus	-5.20922	-0.104441	-0.972499
IPSSN	Pongo pygmaeus	-2.81935	1.33746	0.272217
MHNTZOO201108	Pongo pygmaeus	-4.27764	-0.64351	-0.209712
SENCK1576UU	Pongo pygmaeus	-3.47342	0.258422	-0.36061
MCZ35621	Presbytis hosei	1.18107	0.511089	-0.32867
MCZ37370	Presbytis hosei	0.376066	-1.05146	-0.44291
MCZ37371	Presbytis hosei	0.923183	-0.501028	-0.676946
MCZ37372	Presbytis hosei	0.434058	0.565875	-1.91836
MCZ37772	Presbytis hosei	0.853626	-0.934837	-0.410742
MCZ22276	Presbytis rubicunda	2.59655	1.09429	-0.974132
MCZ35704	Presbytis rubicunda	0.231571	0.634375	-0.409359
MCZ35705	Presbytis rubicunda	1.60183	1.0029	-0.356971
MCZ35706	Presbytis rubicunda	1.49233	1.12671	0.279498
MCZ35712	Presbytis rubicunda	1.09594	0.486814	-0.260121
AMNHM102724	Symphalangus syndactylus	-1.27021	-2.26459	-0.691513
AMNHM106583	Symphalangus syndactylus	-1.51599	0.570368	-2.50396
MCZ36031	Symphalangus syndactylus	-1.20706	-1.16598	-0.338971
MCZ36032	Symphalangus syndactylus	-0.314856	0.834784	-0.353288
AMNHM19549	Theropithecus gelada	0.347103	0.53717	0.289234
AMNHM238034	Theropithecus gelada	0.598485	-0.297861	1.29489
AMNHM60568	Theropithecus gelada	0.400935	-1.17699	1.29502
AMNHM80126	Theropithecus gelada	1.70391	-1.73616	2.25368
AMNHM90309	Theropithecus gelada	0.575082	-0.951616	1.95148
MCZ35567	Trachypithecus cristatus	0.586426	1.62849	-1.83781
MCZ35584	Trachypithecus cristatus	1.22155	0.677063	-1.49698
MCZ35586	Trachypithecus cristatus	0.490021	1.44486	-1.41461
MCZ35597	Trachypithecus cristatus	0.932444	2.73059	-1.49538
MCZ35603	Trachypithecus cristatus	1.10064	2.26429	-1.52647
BAC208	Oreopithecus bambolii	1.07492	-0.234443	1.96674
StW573	Australopithecus sp.	-2.24838	1.03534	0.504799
StW570	Australopithecus sp.	-2.44078	-0.971857	-0.161695
