# Supplementary material for: The evolution of the vestibular apparatus in apes and humans
Source: eLife. 2020 Mar 3;9:e51261. doi: 10.7554/eLife.51261 (PMC7054002; doi:10.7554/eLife.51261)
Supplement: Supplementary file 1. — µCT image stacks were downloaded from MorphoSource digital repository at https://www.MorphoSource.org (Duke University, Durham, NC, USA) or scanned at Paul Sabatier University (PSU, Toulouse, France), the American Museum of Natural History (AMNH; New York, NY, USA) and Centro Nacional de Investigación sobre la Evolución Humana (CENIEH; Burgos, Spain). [file elife-51261-supp1.xlsx]

## Sheet: Foglio1
Species	ID	Source	Voxel size	Sex	DOI
Alouatta palliata	DUEALP 02	MorphoSource	0.06	M	-
Alouatta palliata	DUEALP 04	MorphoSource	0.05	M	-
Alouatta palliata	DUEALP 06	MorphoSource	0.07	M	-
Alouatta palliata	DUEALP 10	MorphoSource	0.05	F	-
Alouatta palliata	DUEALP 12	MorphoSource	0.06	F	-
Ateles geoffroyi	MCZ 10138	MorphoSource	0.06	F	http://dx.doi.org/10.17602/M2/M2917
Ateles geoffroyi	MCZ 29626	MorphoSource	0.06	F	http://dx.doi.org/10.17602/M2/M2918
Ateles geoffroyi	MCZ 29628	MorphoSource	0.06	F	http://dx.doi.org/10.17602/M2/M2919
Ateles geoffroyi	MCZ 29658	MorphoSource	0.06	F	http://dx.doi.org/10.17602/M2/M2920
Ateles geoffroyi	MCZ BOM 5351	MorphoSource	0.06	M	http://dx.doi.org/10.17602/M2/M2889
Cebus apella	MCZ 27891	MorphoSource	0.06	M	http://dx.doi.org/10.17602/M2/M5208
Cebus apella	MCZ 31063	MorphoSource	0.07	F	http://dx.doi.org/10.17602/M2/M5213
Cebus apella	MCZ 37833	MorphoSource	0.06	M	http://dx.doi.org/10.17602/M2/M5218
Cebus apella	MCZ 41090	MorphoSource	0.05	F	http://dx.doi.org/10.17602/M2/M5219
Cebus apella	MCZ 49635	MorphoSource	0.06	M	http://dx.doi.org/10.17602/M2/M5220
Cercocebus galeritus	AMNHM 52634	MorphoSource	0.06	M	-
Cercocebus galeritus	AMNHM 52635	MorphoSource	0.06	F	-
Cercocebus galeritus	AMNHM 52640	MorphoSource	0.06	F	-
Cercocebus galeritus	AMNHM 52641	MorphoSource	0.07	M	-
Cercocebus galeritus	AMNHM 52645	MorphoSource	0.08	M	-
Cercopithecus mitis	MCZ 22734	MorphoSource	0.08	F	http://dx.doi.org/10.17602/M2/M2928
Cercopithecus mitis	MCZ 25022	MorphoSource	0.08	F	http://dx.doi.org/10.17602/M2/M2929
Cercopithecus mitis	MCZ 26832	MorphoSource	0.08	F	http://dx.doi.org/10.17602/M2/M2930
Cercopithecus mitis	MCZ 39389	MorphoSource	0.08	F	http://dx.doi.org/10.17602/M2/M2933
Cercopithecus mitis	MCZ 44264	MorphoSource	0.08	F	http://dx.doi.org/10.17602/M2/M2935
Chlorocebus pygerythrus	SIU 4792	MorphoSource	0.05	F	-
Chlorocebus pygerythrus	SIU 4793	MorphoSource	0.05	F	-
Chlorocebus pygerythrus	SIU 4794	MorphoSource	0.05	F	-
Chlorocebus pygerythrus	SIU 4795	MorphoSource	0.05	M	-
Chlorocebus pygerythrus	SIU 4796	MorphoSource	0.05	M	-
Colobus guereza	AMNHM 52211	MorphoSource	0.07	M	-
Colobus guereza	AMNHM 52213	MorphoSource	0.07	F	-
Colobus guereza	AMNHM 52225	MorphoSource	0.05	F	-
Colobus guereza	AMNHM 52237	MorphoSource	0.07	M	-
Colobus guereza	AMNHM 52249	MorphoSource	0.07	F	-
Erythrocebus patas	MCZ 37280	MorphoSource	0.08	M	http://dx.doi.org/10.17602/M2/M2922
Erythrocebus patas	MCZ 47015	MorphoSource	0.08	M	http://dx.doi.org/10.17602/M2/M2923
Erythrocebus patas	MCZ 47016	MorphoSource	0.08	M	http://dx.doi.org/10.17602/M2/M2924
Erythrocebus patas	MCZ 47017	MorphoSource	0.06	F	http://dx.doi.org/10.17602/M2/M2925
Erythrocebus patas	MCZ 47018	MorphoSource	0.08	F	http://dx.doi.org/10.17602/M2/M2926
Gorilla gorilla	AMNHA 999686	MorphoSource	0.13	M	-
Gorilla gorilla	AMNHA 999687	MorphoSource	0.08	F	-
Gorilla gorilla	AMNHM 167338	MorphoSource	0.13	M	-
Gorilla gorilla	AMNHM 54356	MorphoSource	0.11	F	-
Gorilla gorilla	MCZ 17684	MorphoSource	0.13	F	http://dx.doi.org/10.17602/M2/M2943
Gorilla gorilla	MCZ 26850	MorphoSource	0.12	F	http://dx.doi.org/10.17602/M2/M2943
Gorilla gorilla	MCZ 37264	MorphoSource	0.13	F	http://dx.doi.org/10.17602/M2/M2949
Homo sapiens	EMBR 121	PSU	0.04	F	-
Homo sapiens	EMBR 179	PSU	0.04	M	-
Homo sapiens	EMBR 212	PSU	0.04	F	-
Homo sapiens	EMBR 215	PSU	0.04	M	-
Homo sapiens	EMBR 281	PSU	0.04	F	-
Hoolock hoolock	AMNHM 112673	MorphoSource	0.04	F	-
Hoolock hoolock	AMNHM 112720	MorphoSource	0.05	F	-
Hoolock hoolock	AMNHM 112983	MorphoSource	0.04	M	-
Hoolock hoolock	AMNHM 201742	MorphoSource	0.07	F	-
Hoolock hoolock	AMNHM 83421	MorphoSource	0.04	M	-
Hoolock hoolock	AMNHM 83425	AMNH	0.08	F	-
Hylobates lar	MCZ 41411	MorphoSource	0.07	F	http://dx.doi.org/10.17602/M2/M2959
Hylobates lar	MCZ 41412	MorphoSource	0.07	F	http://dx.doi.org/10.17602/M2/M2961
Hylobates lar	MCZ 41416	MorphoSource	0.07	F	http://dx.doi.org/10.17602/M2/M2965
Hylobates lar	MCZ 41418	MorphoSource	0.07	F	http://dx.doi.org/10.17602/M2/M2967
Hylobates lar	MCZ 41421	MorphoSource	0.07	F	http://dx.doi.org/10.17602/M2/M2969
Hylobates lar	MCZ 41424	MorphoSource	0.07	F	http://dx.doi.org/10.17602/M2/M3007
Hylobates lar	MCZ 41452	MorphoSource	0.07	F	http://dx.doi.org/10.17602/M2/M3011
Lophocebus albigena	AMNHM 52596	MorphoSource	0.07	M	-
Lophocebus albigena	AMNHM 52603	MorphoSource	0.06	F	-
Lophocebus albigena	AMNHM 52606	MorphoSource	0.07	M	-
Lophocebus albigena	AMNHM 52607	MorphoSource	0.09	F	-
Lophocebus albigena	AMNHM 52615	MorphoSource	0.07	F	-
Macaca fascicularis	MCZ 12758	MorphoSource	0.06	F	http://dx.doi.org/10.17602/M2/M3028
Macaca fascicularis	MCZ 22277	MorphoSource	0.06	F	http://dx.doi.org/10.17602/M2/M3029
Macaca fascicularis	MCZ 23812	MorphoSource	0.06	M	http://dx.doi.org/10.17602/M2/M3030
Macaca fascicularis	MCZ 23813	MorphoSource	0.06	F	http://dx.doi.org/10.17602/M2/M3031
Macaca fascicularis	MCZ 35765	MorphoSource	0.06	F	http://dx.doi.org/10.17602/M2/M3033
Mandrillus sphinx	AMNHA 9912049	MorphoSource	0.08	M	-
Mandrillus sphinx	AMNHA 9912056	MorphoSource	0.08	M	-
Mandrillus sphinx	AMNHM 89362	MorphoSource	0.08	M	-
Mandrillus sphinx	AMNHM 89364	MorphoSource	0.1	M	-
Mandrillus sphinx	AMNHM 89365	MorphoSource	0.06	M	-
Miopithecus talapoin	MCZ 19976	MorphoSource	0.05	M	http://dx.doi.org/10.17602/M2/M5095
Miopithecus talapoin	MCZ 23196	MorphoSource	0.05	M	http://dx.doi.org/10.17602/M2/M5094
Miopithecus talapoin	MCZ 23197	MorphoSource	0.05	M	http://dx.doi.org/10.17602/M2/M5093
Miopithecus talapoin	MCZ 34264	MorphoSource	0.05	F	http://dx.doi.org/10.17602/M2/M5092
Miopithecus talapoin	MCZ 37278	MorphoSource	0.05	F	http://dx.doi.org/10.17602/M2/M5086
Nasalis larvatus	MCZ 37342	MorphoSource	0.07	F	http://dx.doi.org/10.17602/M2/M5079
Nasalis larvatus	MCZ 41555	MorphoSource	0.07	F	http://dx.doi.org/10.17602/M2/M5059
Nasalis larvatus	MCZ 41559	MorphoSource	0.07	F	http://dx.doi.org/10.17602/M2/M5057
Nasalis larvatus	MCZ 41560	MorphoSource	0.07	F	http://dx.doi.org/10.17602/M2/M5056
Nasalis larvatus	MCZ 41562	MorphoSource	0.07	F	http://dx.doi.org/10.17602/M2/M5055
Pan paniscus	AMNHM 86857	AMNH	0.12	F	-
Pan paniscus	IPS9033	CENIEH	0.07	F	-
Pan paniscus	MCZ 38018	MorphoSource	0.09	M	http://dx.doi.org/10.17602/M2/M4399
Pan paniscus	MCZ 38019	MorphoSource	0.09	F	http://dx.doi.org/10.17602/M2/M4398
Pan paniscus	MCZ 38020	MorphoSource	0.1	F	http://dx.doi.org/10.17602/M2/M4397
Pan troglodytes	AMNHM 167342	MorphoSource	0.09	M	-
Pan troglodytes	AMNHM 167344	MorphoSource	0.11	M	-
Pan troglodytes	AMNHM 51204	MorphoSource	0.08	M	-
Pan troglodytes	IPS5698	CENIEH	0.08	M	-
Pan troglodytes	MCZ 17702	MorphoSource	0.1	F	http://dx.doi.org/10.17602/M2/M4395
Pan troglodytes	MCZ 23167	MorphoSource	0.11	F	http://dx.doi.org/10.17602/M2/M4390
Pan troglodytes	MCZ 26847	MorphoSource	0.1	F	http://dx.doi.org/10.17602/M2/M4389
Papio anubis	AMNHM 52677	MorphoSource	0.09	M	-
Papio anubis	MCZ 17342	MorphoSource	0.11	M	http://dx.doi.org/10.17602/M2/M4885
Papio anubis	MCZ 26473	MorphoSource	0.1	F	http://dx.doi.org/10.17602/M2/M4890
Papio anubis	MCZ 31619	MorphoSource	0.11	F	http://dx.doi.org/10.17602/M2/M4892
Papio anubis	MCZ BOM 8466	MorphoSource	0.08	M	http://dx.doi.org/10.17602/M2/M4889
Piliocolobus badius	MCZ 24080	MorphoSource	0.08	M	http://dx.doi.org/10.17602/M2/M2892
Piliocolobus badius	MCZ 24775	MorphoSource	0.09	M	http://dx.doi.org/10.17602/M2/M2893
Piliocolobus badius	MCZ 24793	MorphoSource	0.08	F	http://dx.doi.org/10.17602/M2/M2894
Piliocolobus badius	MCZ 25627	MorphoSource	0.08	M	http://dx.doi.org/10.17602/M2/M2895
Piliocolobus badius	MCZ 25631	MorphoSource	0.09	M	http://dx.doi.org/10.17602/M2/M2896
Pongo pygmaeus	IPS10647	CENIEH	0.08	F	-
Pongo pygmaeus	IPS10651	CENIEH	0.08	F	-
Pongo pygmaeus	IPS9031	CENIEH	0.08	F	-
Pongo pygmaeus	IPSSN	CENIEH	0.08	F	-
Pongo pygmaeus	MHNTZOO 201108	PSU	0.04	?	-
Pongo pygmaeus	SENCK 1576UU	PSU	0.01	?	-
Presbytis hosei	MCZ 35621	MorphoSource	0.08	F	http://dx.doi.org/10.17602/M2/M4611
Presbytis hosei	MCZ 37370	MorphoSource	0.08	F	http://dx.doi.org/10.17602/M2/M4610
Presbytis hosei	MCZ 37371	MorphoSource	0.08	M	http://dx.doi.org/10.17602/M2/M4609
Presbytis hosei	MCZ 37372	MorphoSource	0.08	F	http://dx.doi.org/10.17602/M2/M4608
Presbytis hosei	MCZ 37772	MorphoSource	0.08	F	http://dx.doi.org/10.17602/M2/M4607
Presbytis rubicunda	MCZ 22276	MorphoSource	0.08	M	http://dx.doi.org/10.17602/M2/M4557
Presbytis rubicunda	MCZ 35704	MorphoSource	0.08	F	http://dx.doi.org/10.17602/M2/M4552
Presbytis rubicunda	MCZ 35705	MorphoSource	0.08	F	http://dx.doi.org/10.17602/M2/M4551
Presbytis rubicunda	MCZ 35706	MorphoSource	0.08	F	http://dx.doi.org/10.17602/M2/M4556
Presbytis rubicunda	MCZ 35712	MorphoSource	0.08	M	http://dx.doi.org/10.17602/M2/M4555
Symphalangus syndactylus	AMNHM 102724	MorphoSource	0.06	M	-
Symphalangus syndactylus	AMNHM 106583	AMNH	0.08	F	-
Symphalangus syndactylus	MCZ 36031	MorphoSource	0.08	M	http://dx.doi.org/10.17602/M2/M4444
Symphalangus syndactylus	MCZ 36032	MorphoSource	0.07	F	http://dx.doi.org/10.17602/M2/M4443
Theropithecus gelada	AMNHM 19549	MorphoSource	0.08	M	-
Theropithecus gelada	AMNHM 238034	MorphoSource	0.12	F	-
Theropithecus gelada	AMNHM 60568	MorphoSource	0.08	M	-
Theropithecus gelada	AMNHM 80126	MorphoSource	0.09	M	-
Theropithecus gelada	AMNHM 90309	MorphoSource	0.09	M	-
Trachypithecus cristatus	MCZ 35567	MorphoSource	0.05	F	http://dx.doi.org/10.17602/M2/M4439
Trachypithecus cristatus	MCZ 35584	MorphoSource	0.05	F	http://dx.doi.org/10.17602/M2/M4436
Trachypithecus cristatus	MCZ 35586	MorphoSource	0.05	F	http://dx.doi.org/10.17602/M2/M4435
Trachypithecus cristatus	MCZ 35597	MorphoSource	0.05	F	http://dx.doi.org/10.17602/M2/M4433
Trachypithecus cristatus	MCZ 35603	MorphoSource	0.05	F	http://dx.doi.org/10.17602/M2/M4431
Oreopithecus bambolii	BAC 208	NMB	0.02905	?	-
Australopithecus sp.	StW 573	DNMNH	0.088	F	-
Australopithecus sp.	StW 578	DNMNH	0.066	?	-
